# Supplementary material for: Withaferin A and Celastrol Overwhelm Proteostasis
Source: MDPI journal article supplement (doi:10.3390/ijms25010367), 2023-12-27
Supplement: s1 [file s1]

**Table S1**

Supplementary Table S1-1: Direct WA targets according to Dom et al. [124].

Supplementary Table S1-2: WA-downregulated proteins according to Dom et al. [124].

Supplementary Table S1-3: WA-downregulated proteins according to Narayan et al. [123].

Supplementary Table S1-4: WA-unfolded proteins according to Vilaboa et al. [120].

Supplementary Table S1-5: Direct WA targets of Dom et al. [124] that were found to aggregate.

Supplementary Table S1-6: WA-downregulated proteins of Dom et al. [124] that were found to aggregate.

**Table S2**

Supplementary Table S2-1: Direct CEL targets according to Zhou et al. [122].

Supplementary Table S2-2: Direct CEL targets according to Zhang et al. [134].

Supplementary Table S2-3: Direct CEL targets common to Zhou et al. [122] and Zhang et al. [134].

Supplementary Table S2-4: Direct WA targets of Dom et al. [124] that were also identified as direct CEL targets by Zhou et al. [122] and Zhang et al. 2022 [134].
