# Supplementary material for: Withaferin A and Celastrol Overwhelm Proteostasis
Source: Int J Mol Sci. 2023 Dec 27;25(1):367. doi: 10.3390/ijms25010367 (PMC10779417; doi:10.3390/ijms25010367)
Supplement: Supplementary file 1 [file ijms-25-00367-s001.zip › Table S1.xls]

## Sheet: Supplementary Table S1-1
UniProtKB Entry Name	Protein name
1B81_HUMAN	HLA class I histocompatibility antigen, B-81 alpha chain
2ABA_HUMAN	Serine/threonine-protein phosphatase 2A 55 kDa regulatory subunit B alpha isoform
ABCBA_HUMAN	ATP-binding cassette sub-family B member 10, mitochondrial
AGK_HUMAN	Acylglycerol kinase, mitochondrial
AGM1_HUMAN	Phosphoacetylglucosamine mutase
AIP_HUMAN	AH receptor-interacting protein
ALAT2_HUMAN	Alanine aminotransferase 2
AP3D1_HUMAN	AP-3 complex subunit delta-1
ARAP1_HUMAN	Arf-GAP with Rho-GAP domain, ANK repeat and PH domain-containing protein 1
ARFG3_HUMAN	ADP-ribosylation factor GTPase-activating protein 3
AROS_HUMAN	Active regulator of SIRT1
ASAH1_HUMAN	Acid ceramidase
ASCC2_HUMAN	Activating signal cointegrator 1 complex subunit 2
AT2A2_HUMAN	Sarcoplasmic/endoplasmic reticulum calcium ATPase 2
BAG2_HUMAN	BAG family molecular chaperone regulator 2
BRE1B_HUMAN	E3 ubiquitin-protein ligase BRE1B
BTAF1_HUMAN	TATA-binding protein-associated factor
C2D1A_HUMAN	Coiled-coil and C2 domain-containing protein 1A
CAMLG_HUMAN	Calcium signal-modulating cyclophilin ligand
CBL_HUMAN	E3 ubiquitin-protein ligase CBL
CCD22_HUMAN	Coiled-coil domain-containing protein 22
CCDC6_HUMAN	Coiled-coil domain-containing protein 6
CD70_HUMAN	CD70 antigen
CD9_HUMAN	CD9 antigen
CETN2_HUMAN	Centrin-2
CGL_HUMAN	Cystathionine gamma-lyase
CH033_HUMAN	UPF0488 protein C8orf33
CK054_HUMAN	Ester hydrolase C11orf54
CK084_HUMAN	Uncharacterized protein C11orf84
CMTD1_HUMAN	Catechol O-methyltransferase domain-containing protein 1
COMD3_HUMAN	COMM domain-containing protein 3
CRLF3_HUMAN	Cytokine receptor-like factor 3
CSN2_HUMAN	COP9 signalosome complex subunit 2
CTBP1_HUMAN	C-terminal-binding protein 1
CWC22_HUMAN	Pre-mRNA-splicing factor CWC22 homolog
CYB5B_HUMAN	Cytochrome b5 type B
DCPS_HUMAN	m7GpppX diphosphatase
DDX1_HUMAN	ATP-dependent RNA helicase DDX1
DDX28_HUMAN	Probable ATP-dependent RNA helicase DDX28
DDX54_HUMAN	ATP-dependent RNA helicase DDX54
DEK_HUMAN	Protein DEK
DEST_HUMAN	Destrin
DHB7_HUMAN	3-keto-steroid reductase
DHX29_HUMAN	ATP-dependent RNA helicase DHX29
DNJA2_HUMAN	DnaJ homolog subfamily A member 2
DP13A_HUMAN	DCC-interacting protein 13-alpha
DTBP1_HUMAN	Dysbindin
EDEM3_HUMAN	ER degradation-enhancing alpha-mannosidase-like protein 3
EFR3A_HUMAN	Protein EFR3 homolog A
ERBIN_HUMAN	Erbin
ERGI3_HUMAN	Endoplasmic reticulum-Golgi intermediate compartment protein 3
ESAM_HUMAN	Endothelial cell-selective adhesion molecule
ETUD1_HUMAN	Elongation factor-like GTPase 1
F1142_HUMAN	Protein FAM114A2
F158A_HUMAN	ER membrane protein complex subunit 9
FER_HUMAN	Tyrosine-protein kinase Fer
FXR2_HUMAN	Fragile X mental retardation syndrome-related protein 2
GATB_HUMAN	Glutamyl-tRNA amidotransferase subunit B, mitochondrial
GATC_HUMAN	Glutamyl-tRNA amidotransferase subunit C, mitochondrial
GCSH_HUMAN	Glycine cleavage system H protein, mitochondrial
GGA2_HUMAN	ADP-ribosylation factor-binding protein GGA2
GNAI3_HUMAN	Guanine nucleotide-binding protein G subunit alpha
GYS1_HUMAN	Glycogen [starch] synthase, muscle
HACD3_HUMAN	Very-long-chain -3-hydroxyacyl-CoA dehydratase 3
HBXIP_HUMAN	Ragulator complex protein LAMTOR5
HDAC6_HUMAN	Histone deacetylase 6
HDGF_HUMAN	Hepatoma-derived growth factor
HERP1_HUMAN	Homocysteine-responsive endoplasmic reticulum-resident ubiquitin-like domain member 1
HNRDL_HUMAN	Heterogeneous nuclear ribonucleoprotein D-like
HS2ST_HUMAN	Heparan sulfate 2-O-sulfotransferase 1
HSF1_HUMAN	Heat shock factor protein 1
IF4B_HUMAN	Eukaryotic translation initiation factor 4B
IF5A1_HUMAN	Eukaryotic translation initiation factor 5A-1
INT9_HUMAN	Integrator complex subunit 9
KAT3_HUMAN	Kynurenine--oxoglutarate transaminase 3
KC1G2_HUMAN	Casein kinase I isoform gamma-2
KDIS_HUMAN	Kinase D-interacting substrate of 220 kDa
KDM2A_HUMAN	Lysine-specific demethylase 2A
KT3K_HUMAN	Ketosamine-3-kinase
LEMD2_HUMAN	LEM domain-containing protein 2
LGMN_HUMAN	Legumain
LPCT4_HUMAN	Lysophospholipid acyltransferase LPCAT4
MAGD2_HUMAN	Melanoma-associated antigen D2
MAN1_HUMAN	Inner nuclear membrane protein Man1
MCAT_HUMAN	Mitochondrial carnitine/acylcarnitine carrier protein
MCES_HUMAN	mRNA cap guanine-N7 methyltransferase
MCMBP_HUMAN	Mini-chromosome maintenance complex-binding protein
MED16_HUMAN	Mediator of RNA polymerase II transcription subunit 16
MED24_HUMAN	Mediator of RNA polymerase II transcription subunit 24
MED29_HUMAN	Mediator of RNA polymerase II transcription subunit 29
MIA3_HUMAN	Melanoma inhibitory activity protein 3
MIC26_HUMAN	MICOS complex subunit MIC26
MIC27_HUMAN	MICOS complex subunit MIC27
MILK1_HUMAN	MICAL-like protein 1
MINT_HUMAN	Msx2-interacting protein
MIRO1_HUMAN	Mitochondrial Rho GTPase 1
MIRO2_HUMAN	Mitochondrial Rho GTPase 2
MPP10_HUMAN	U3 small nucleolar ribonucleoprotein protein MPP10
MTAP_HUMAN	S-methyl-5'-thioadenosine phosphorylase
MYOM3_HUMAN	Myomesin-3
NAT10_HUMAN	RNA cytidine acetyltransferase
NBEL2_HUMAN	Neurobeachin-like protein 2
NCBP3_HUMAN	Nuclear cap-binding protein subunit 3
NCOA6_HUMAN	Nuclear receptor coactivator 6
NELFE_HUMAN	Negative elongation factor E
NENF_HUMAN	Neudesin
NEUR1_HUMAN	Sialidase-1
NFYA_HUMAN	Nuclear transcription factor Y subunit alpha
NGDN_HUMAN	Neuroguidin
NGLY1_HUMAN	Peptide-N-asparagine amidase
NIPA_HUMAN	Nuclear-interacting partner of ALK
NIT1_HUMAN	Nitrilase homolog 1
NOC2L_HUMAN	Nucleolar complex protein 2 homolog
NOC4L_HUMAN	Nucleolar complex protein 4 homolog
NOL10_HUMAN	Nucleolar protein 10
NOL8_HUMAN	Nucleolar protein 8
NOL9_HUMAN	Polynucleotide 5'-hydroxyl-kinase NOL9
NOM1_HUMAN	Nucleolar MIF4G domain-containing protein 1
NT5D1_HUMAN	5'-nucleotidase domain-containing protein 1
NUBP2_HUMAN	Cytosolic Fe-S cluster assembly factor NUBP2
NUFP2_HUMAN	Nuclear fragile X mental retardation-interacting protein 2
NUP43_HUMAN	Nucleoporin Nup43
OSBP1_HUMAN	Oxysterol-binding protein 1
P66B_HUMAN	Transcriptional repressor p66-beta
PARP4_HUMAN	Poly [ADP-ribose] polymerase 4
PCF11_HUMAN	Pre-mRNA cleavage complex 2 protein Pcf11
PECR_HUMAN	Peroxisomal trans-2-enoyl-CoA reductase
PELP1_HUMAN	Proline-, glutamic acid- and leucine-rich protein 1
PHC3_HUMAN	Polyhomeotic-like protein 3
PLAP_HUMAN	Phospholipase A-2-activating protein
PLPL8_HUMAN	Calcium-independent phospholipase A2-gamma
PPID_HUMAN	Peptidyl-prolyl cis-trans isomerase D
PPM1B_HUMAN	Protein phosphatase 1B
PPWD1_HUMAN	Peptidylprolyl isomerase domain and WD repeat-containing protein 1
PREX2_HUMAN	Phosphatidylinositol 3,4,5-trisphosphate-dependent Rac exchanger 2 protein
PSB10_HUMAN	Proteasome subunit beta type-10
PSME4_HUMAN	Proteasome activator complex subunit 4
PTCD1_HUMAN	Pentatricopeptide repeat-containing protein 1, mitochondrial
PTPRA_HUMAN	Receptor-type tyrosine-protein phosphatase alpha
PUM2_HUMAN	Pumilio homolog 2
PUS7_HUMAN	Pseudouridylate synthase 7 homolog
PX11B_HUMAN	Peroxisomal membrane protein 11B
QSOX2_HUMAN	Sulfhydryl oxidase 2
RASA1_HUMAN	Ras GTPase-activating protein 1
RASA2_HUMAN	Ras GTPase-activating protein 2
RB6I2_HUMAN	ELKS/Rab6-interacting/CAST family member 1
RECQ1_HUMAN	ATP-dependent DNA helicase Q1
RFX1_HUMAN	MHC class II regulatory factor RFX1
RHG04_HUMAN	Rho GTPase-activating protein 4
RHG25_HUMAN	Rho GTPase-activating protein 25
RL30_HUMAN	60S ribosomal protein L30
RLP24_HUMAN	Probable ribosome biogenesis protein RLP24
RM52_HUMAN	39S ribosomal protein L52, mitochondrial
RMD3_HUMAN	Regulator of microtubule dynamics protein 3
RPAB1_HUMAN	DNA-directed RNA polymerases I, II, and III subunit RPABC1
RRP44_HUMAN	Exosome complex exonuclease RRP44
RSRC2_HUMAN	Arginine/serine-rich coiled-coil protein 2
RT18C_HUMAN	28S ribosomal protein S18c, mitochondrial
S38A2_HUMAN	Sodium-coupled neutral amino acid transporter 2
SC24D_HUMAN	Protein transport protein Sec24D
SCAM1_HUMAN	Secretory carrier-associated membrane protein 1
SCLY_HUMAN	Selenocysteine lyase
SDA1_HUMAN	Protein SDA1 homolog
SELR1_HUMAN	Cytochrome c oxidase assembly factor 7
SENP3_HUMAN	Sentrin-specific protease 3
SH3L1_HUMAN	SH3 domain-binding glutamic acid-rich-like protein
SMAP_HUMAN	Small acidic protein
SNAPN_HUMAN	SNARE-associated protein Snapin
SNX27_HUMAN	Sorting nexin-27
SRRT_HUMAN	Serrate RNA effector molecule homolog
SSU72_HUMAN	RNA polymerase II subunit A C-terminal domain phosphatase SSU72
STXB3_HUMAN	Syntaxin-binding protein 3
SYWM_HUMAN	Tryptophan--tRNA ligase, mitochondrial
T2EA_HUMAN	General transcription factor IIE subunit 1
TACO1_HUMAN	Translational activator of cytochrome c oxidase 1
TBC15_HUMAN	TBC1 domain family member 15
TBL3_HUMAN	Transducin beta-like protein 3
TF2B_HUMAN	Transcription initiation factor IIB
TFB2M_HUMAN	Dimethyladenosine transferase 2, mitochondrial
TFP11_HUMAN	Tuftelin-interacting protein 11
THTM_HUMAN	3-mercaptopyruvate sulfurtransferase
TIA1_HUMAN	Nucleolysin TIA-1 isoform p40
TMCO1_HUMAN	Calcium load-activated calcium channel
TMED2_HUMAN	Transmembrane emp24 domain-containing protein 2
TMEM9_HUMAN	Transmembrane protein 9
TPPP_HUMAN	Tubulin polymerization-promoting protein
TRM1L_HUMAN	TRMT1-like protein
TS101_HUMAN	Tumor susceptibility gene 101 protein
TSN7_HUMAN	Tetraspanin-7
TTK_HUMAN	Dual specificity protein kinase TTK
TXD11_HUMAN	Thioredoxin domain-containing protein 11
UBC9_HUMAN	SUMO-conjugating enzyme UBC9
UBFD1_HUMAN	Ubiquitin domain-containing protein UBFD1
UCHL5_HUMAN	Ubiquitin carboxyl-terminal hydrolase isozyme L5
UFSP2_HUMAN	Ufm1-specific protease 2
UIF_HUMAN	UAP56-interacting factor
UIMC1_HUMAN	BRCA1-A complex subunit RAP80
VIP2_HUMAN	Inositol hexakisphosphate and diphosphoinositol-pentakisphosphate kinase 2
VP13C_HUMAN	Vacuolar protein sorting-associated protein 13C
VP26A_HUMAN	Vacuolar protein sorting-associated protein 26A
WAPL_HUMAN	Wings apart-like protein homolog
WASH7_HUMAN	WASH complex subunit SWIP
WDR46_HUMAN	WD repeat-containing protein 46
WDR91_HUMAN	WD repeat-containing protein 91
WIPI2_HUMAN	WD repeat domain phosphoinositide-interacting protein 2
XPF_HUMAN	DNA repair endonuclease XPF
XPO7_HUMAN	Exportin-7
ZFY16_HUMAN	Zinc finger FYVE domain-containing protein 16
ZN598_HUMAN	Zinc finger protein 598

## Sheet: Supplementary Table S1-2
UniProtKB Entry Name	Protein Name
ABCB8_HUMAN	ATP-binding cassette sub-family B member 8, mitochondrial
ADK_HUMAN	Adenosine kinase
ANXA4_HUMAN	Annexin A4
APOB_HUMAN	Apolipoprotein B-100
APOE_HUMAN	Apolipoprotein E
ASC_HUMAN	Apoptosis-associated speck-like protein containing a CARD
BOP1_HUMAN	Ribosome biogenesis protein BOP1
CAN1_HUMAN	Calpain-1 catalytic subunit
CEBPZ_HUMAN	CCAAT/enhancer-binding protein zeta
CKAP5_HUMAN	Cytoskeleton-associated protein 5
CLPT1_HUMAN	Cleft lip and palate transmembrane protein 1
CMTD1_HUMAN	Catechol O-methyltransferase domain-containing protein 1
CNOT1_HUMAN	CCR4-NOT transcription complex subunit 1
CPSF7_HUMAN	Cleavage and polyadenylation specificity factor subunit 7
CYC_HUMAN	Cytochrome c
DESP_HUMAN	Desmoplakin
DIAP1_HUMAN	Protein diaphanous homolog 1
DJC10_HUMAN	DnaJ homolog subfamily C member 10
DYST_HUMAN	Dystonin
EHD3_HUMAN	EH domain-containing protein 3
EIF1B_HUMAN	Eukaryotic translation initiation factor 1b
EIF3M_HUMAN	Eukaryotic translation initiation factor 3 subunit M
ERF1_HUMAN	Eukaryotic peptide chain release factor subunit 1
FKBP4_HUMAN	Peptidyl-prolyl cis-trans isomerase FKBP4
GPX1_HUMAN	Glutathione peroxidase 1
HACL1_HUMAN	2-hydroxyacyl-CoA lyase 1
HAX1_HUMAN	HCLS1-associated protein X-1
HSP13_HUMAN	Heat shock 70 kDa protein 13
IPYR2_HUMAN	Inorganic pyrophosphatase 2, mitochondrial
ITAL_HUMAN	Integrin alpha-L
MANBA_HUMAN	Beta-mannosidase
MIPEP_HUMAN	Mitochondrial intermediate peptidase
NPC1_HUMAN	Niemann-Pick C1 protein
NU214_HUMAN	Nuclear pore complex protein Nup214
PI4KA_HUMAN	Phosphatidylinositol 4-kinase alpha
QSOX2_HUMAN	Sulfhydryl oxidase 2
RAB4A_HUMAN	Ras-related protein Rab-4A
SC24A_HUMAN	Protein transport protein Sec24A
SEH1_HUMAN	Nucleoporin SEH1
SIAS_HUMAN	Sialic acid synthase
SNUT1_HUMAN	U4/U6.U5 tri-snRNP-associated protein 1
SRP54_HUMAN	Signal recognition particle 54 kDa protein
STAG1_HUMAN	Cohesin subunit SA-1
STK10_HUMAN	Serine/threonine-protein kinase 10
SYYM_HUMAN	Tyrosine--tRNA ligase, mitochondrial
TBB1_HUMAN	Tubulin beta-1 chain
TCPZ_HUMAN	T-complex protein 1 subunit zeta
THOP1_HUMAN	Thimet oligopeptidase
TMF1_HUMAN	TATA element modulatory factor
TRAM1_HUMAN	Translocating chain-associated membrane protein 1
TSP1_HUMAN	Thrombospondin-1
TTC7A_HUMAN	Tetratricopeptide repeat protein 7A
VTNC_HUMAN	Vitronectin

## Sheet: Supplementary Table S1-3
UniProtKB Entry Name	Protein Name
ANXA1_MOUSE	Annexin A1
KI67_MOUSE	Proliferation marker protein Ki-67
SNG1_MOUSE	Synaptogyrin-1
TAGL2_MOUSE	Transgelin-2

## Sheet: Supplementary Table S1-4
UniProtKB Entry Name	Protein Name
2AAB_HUMAN	Serine/threonine-protein phosphatase 2A 65 kDa regulatory subunit A beta isoform
5NT3A_HUMAN	Cytosolic 5'-nucleotidase 3A
A0A024R4E5_HUMAN	High density lipoprotein binding protein (Vigilin), isoform CRA_a
A0A0X1KG71_HUMAN	Negative elongation factor B
AACS_HUMAN	Acetoacetyl-CoA synthetase
AAKG1_HUMAN	5'-AMP-activated protein kinase subunit gamma-1
AAPK1_HUMAN	5'-AMP-activated protein kinase catalytic subunit alpha-1
AAR2_HUMAN	Protein AAR2 homolog
AASD1_HUMAN	Alanyl-tRNA editing protein Aarsd1
ABCF3_HUMAN	ATP-binding cassette sub-family F member 3
ABR_HUMAN	Active breakpoint cluster region-related protein
ABTB2_HUMAN	Ankyrin repeat and BTB/POZ domain-containing protein 2
ACACA_HUMAN	Acetyl-CoA carboxylase 1
ACBD6_HUMAN	Acyl-CoA-binding domain-containing protein 6
ACOC_HUMAN	Cytoplasmic aconitate hydratase
ACSL1_HUMAN	Long-chain-fatty-acid--CoA ligase 1
ADPPT_HUMAN	L-aminoadipate-semialdehyde dehydrogenase-phosphopantetheinyl transferase
AIFM2_HUMAN	Apoptosis-inducing factor 2
AIMP2_HUMAN	Aminoacyl tRNA synthase complex-interacting multifunctional protein 2
AIP_HUMAN	AH receptor-interacting protein
AJUBA_HUMAN	LIM domain-containing protein ajuba
AKA10_HUMAN	A-kinase anchor protein 10, mitochondrial
AKT1_HUMAN	RAC-alpha serine/threonine-protein kinase
AKT2_HUMAN	RAC-beta serine/threonine-protein kinase
AL14E_HUMAN	ARL14 effector protein
AMMR1_HUMAN	AMME syndrome candidate gene 1 protein
AN30A_HUMAN	Ankyrin repeat domain-containing protein 30A
ANC2_HUMAN	Anaphase-promoting complex subunit 2
ANFY1_HUMAN	Rabankyrin-5
ANKH1_HUMAN	Ankyrin repeat and KH domain-containing protein 1
ANKL2_HUMAN	Ankyrin repeat and LEM domain-containing protein 2
ANLN_HUMAN	Anillin
ANM1_HUMAN	Protein arginine N-methyltransferase 1
ANR17_HUMAN	Ankyrin repeat domain-containing protein 17
ANR44_HUMAN	Serine/threonine-protein phosphatase 6 regulatory ankyrin repeat subunit B
ANR52_HUMAN	Serine/threonine-protein phosphatase 6 regulatory ankyrin repeat subunit C
AP3M1_HUMAN	AP-3 complex subunit mu-1
AP4B1_HUMAN	AP-4 complex subunit beta-1
AP4M1_HUMAN	AP-4 complex subunit mu-1
APBB1_HUMAN	Amyloid beta A4 precursor protein-binding family B member 1
APC1_HUMAN	Anaphase-promoting complex subunit 1
APC5_HUMAN	Anaphase-promoting complex subunit 5
APC7_HUMAN	Anaphase-promoting complex subunit 7
APT_HUMAN	Adenine phosphoribosyltransferase
ARAF_HUMAN	Serine/threonine-protein kinase A-Raf
ARAP1_HUMAN	Arf-GAP with Rho-GAP domain, ANK repeat and PH domain-containing protein 1
ARAP3_HUMAN	Arf-GAP with Rho-GAP domain, ANK repeat and PH domain-containing protein 3
ARFG3_HUMAN	ADP-ribosylation factor GTPase-activating protein 3
ARHG1_HUMAN	ARHG1_HUMAN Rho guanine nucleotide exchange factor 1
ARHG7_HUMAN	Rho guanine nucleotide exchange factor 7
ARHGC_HUMAN	Rho guanine nucleotide exchange factor 12
ARMC6_HUMAN	Armadillo repeat-containing protein 6
ARMC8_HUMAN	Armadillo repeat-containing protein 8
ARMC9_HUMAN	LisH domain-containing protein ARMC9
ARNT_HUMAN	Aryl hydrocarbon receptor nuclear translocator
ARPC5_HUMAN	Actin-related protein 2/3 complex subunit 5
ASAP3_HUMAN	Arf-GAP with SH3 domain, ANK repeat and PH domain-containing protein 3
ASF1B_HUMAN	Histone chaperone ASF1B
ASUN_HUMAN	Protein asunder homolog
ATG3_HUMAN	Ubiquitin-like-conjugating enzyme ATG3
ATG4B_HUMAN	Cysteine protease ATG4B
ATRIP_HUMAN	ATR-interacting protein
AURKA_HUMAN	Aurora kinase A
BABA1_HUMAN	BRISC and BRCA1-A complex member 1
BAG3_HUMAN	BAG family molecular chaperone regulator 3
BAG5_HUMAN	BAG family molecular chaperone regulator 5
BAP1_HUMAN	Ubiquitin carboxyl-terminal hydrolase BAP1
BCCIP_HUMAN	BRCA2 and CDKN1A-interacting protein
BCD1_HUMAN	Box C/D snoRNA protein 1
BCL10_HUMAN	BCL10_HUMAN B-cell lymphoma/leukemia 10
BCR_HUMAN	Breakpoint cluster region protein
BDH_HUMAN	D-beta-hydroxybutyrate dehydrogenase, mitochondrial
BET1_HUMAN	BET1 homolog
BIG2_HUMAN	Brefeldin A-inhibited guanine nucleotide-exchange protein 2
BOLA2_HUMAN	BolA-like protein 2
BRAP_HUMAN	BRCA1-associated protein
BRCC3_HUMAN	Lys-63-specific deubiquitinase BRCC36
BTBD1_HUMAN	BTB/POZ domain-containing protein 1
BUB1B_HUMAN	Mitotic checkpoint s+9:158erine/threonine-protein kinase BUB1 beta
BZW1_HUMAN	Basic leucine zipper and W2 domain-containing protein 1
C10_HUMAN	Protein C10
C170B_HUMAN	Centrosomal protein of 170 kDa protein B
C170L_HUMAN	Cep170-like protein
C19L1_HUMAN	CWF19-like protein 1
C43BP_HUMAN	Collagen type IV alpha-3-binding protein
C9J0J7_HUMAN	Profilin
C9JA93_HUMAN	TBC1 domain family member 15 (Fragment)
CA198_HUMAN	Uncharacterized protein C1orf198
CAN2_HUMAN	Calpain-2 catalytic subunit
CAN7_HUMAN	Calpain-7
CASP8_HUMAN	Caspase-8
CBR4_HUMAN	Carbonyl reductase family member 4
CBWD1_HUMAN	COBW domain-containing protein 1
CC85C_HUMAN	Coiled-coil domain-containing protein 85C
CCD22_HUMAN	Coiled-coil domain-containing protein 22
CCD93_HUMAN	Coiled-coil domain-containing protein 93
CCD97_HUMAN	Coiled-coil domain-containing protein 97
CCNB1_HUMAN	G2/mitotic-specific cyclin-B1
CCNB2_HUMAN	G2/mitotic-specific cyclin-B2
CCS_HUMAN	Copper chaperone for superoxide dismutase
CCYL1_HUMAN	Cyclin-Y-like protein 1
CCZ1B_HUMAN	Vacuolar fusion protein CCZ1 homolog B
CDC16_HUMAN	Cell division cycle protein 16 homolog
CDC20_HUMAN	Cell division cycle protein 20 homolog
CDC23_HUMAN	Cell division cycle protein 23 homolog
CDC27_HUMAN	Cell division cycle protein 27 homolog
CDC45_HUMAN	Cell division control protein 45 homolog
CDC73_HUMAN	Parafibromin
CDK1_HUMAN	CDK1_HUMAN Cyclin-dependent kinase 1
CDK2_HUMAN	Cyclin-dependent kinase 2
CDK4_HUMAN	Cyclin-dependent kinase 4
CDK5_HUMAN	Cyclin-dependent-like kinase 5
CDKAL_HUMAN	Threonylcarbamoyladenosine tRNA methylthiotransferase
CDN2A_HUMAN	Cyclin-dependent kinase inhibitor 2A
CE022_HUMAN	UPF0489 protein C5orf22
CE051_HUMAN	UPF0600 protein C5orf51
CENPM_HUMAN	Centromere protein M
CEP44_HUMAN	Centrosomal protein of 44 kDa
CEP55_HUMAN	Centrosomal protein of 55 kDa
CEP85_HUMAN	Centrosomal protein of 85 kDa
CEP97_HUMAN	Centrosomal protein of 97 kDa
CHIP_HUMAN	E3 ubiquitin-protein ligase CHIP
CHK1_HUMAN	Serine/threonine-protein kinase Chk1
CHK2_HUMAN	Serine/threonine-protein kinase Chk2
CHKA_HUMAN	Choline kinase alpha
CHSP1_HUMAN	Calcium-regulated heat-stable protein 1
CI064_HUMAN	UPF0553 protein C9orf64
CIAO1_HUMAN	Probable cytosolic iron-sulfur protein assembly protein CIAO1
CIKS_HUMAN	Adapter protein CIKS
CIP2A_HUMAN	Protein CIP2A
CK5P2_HUMAN	CDK5 regulatory subunit-associated protein 2
CL029_HUMAN	Uncharacterized protein C12orf29
CLAP1_HUMAN	CLIP-associating protein 1
CLAP2_HUMAN	CLIP-associating protein 2
CLIC3_HUMAN	CLIC3_HUMAN Chloride intracellular channel protein 3
CLSPN_HUMAN	Claspin
CMIP_HUMAN	C-Maf-inducing protein
CND1_HUMAN	Condensin complex subunit 1
CND2_HUMAN	Condensin complex subunit 2
CND3_HUMAN	Condensin complex subunit 3
CNDH2_HUMAN	Condensin-2 complex subunit H2
CNN2_HUMAN	Calponin-2
CNOT1_HUMAN	CCR4-NOT transcription complex subunit 1
CNOT3_HUMAN	CCR4-NOT transcription complex subunit 3
COA7_HUMAN	Cytochrome c oxidase assembly factor 7
COG4_HUMAN	Conserved oligomeric Golgi complex subunit 4
COG5_HUMAN	Conserved oligomeric Golgi complex subunit 5
COG6_HUMAN	Conserved oligomeric Golgi complex subunit 6
COG7_HUMAN	Conserved oligomeric Golgi complex subunit 7
COMD3_HUMAN	COMM domain-containing protein 3
COMD4_HUMAN	COMM domain-containing protein 4
COMD9_HUMAN	COMM domain-containing protein 9
COPA_HUMAN	Coatomer subunit alpha
COPB_HUMAN	Coatomer subunit beta
COPE_HUMAN	Coatomer subunit epsilon
CP51A_HUMAN	Lanosterol 14-alpha demethylase
CPNE1_HUMAN	Copine-1
CR025_HUMAN	Uncharacterized protein C18orf25
CRBN_HUMAN	Protein cereblon
CRYAB_HUMAN	Alpha-crystallin B chain
CSDE1_HUMAN	Cold shock domain-containing protein E1
CSK_HUMAN	Tyrosine-protein kinase CSK
CT2NL_HUMAN	CTTNBP2 N-terminal-like protein
CT55_HUMAN	Cancer/testis antigen 55
CTDP1_HUMAN	RNA polymerase II subunit A C-terminal domain phosphatase
CTNL1_HUMAN	Alpha-catulin
CTR9_HUMAN	RNA polymerase-associated protein CTR9 homolog
D4Q8H0_HUMAN	Mitogen-activated protein kinase kinase kinase MLT
DAAF5_HUMAN	Dynein assembly factor 5, axonemal
DBNL_HUMAN	Drebrin-like protein
DCAF7_HUMAN	DDB1- and CUL4-associated factor 7
DCC1_HUMAN	DSister chromatid cohesion protein DCC1
DCNL5_HUMAN	DCN1-like protein 5
DCP1A_HUMAN	mRNA-decapping enzyme 1A
DCTN3_HUMAN	Dynactin subunit 3
DDX20_HUMAN	Probable ATP-dependent RNA helicase DDX20
DDX58_HUMAN	Probable ATP-dependent RNA helicase DDX58
DEN4C_HUMAN	DENN domain-containing protein 4C
DEN5B_HUMAN	DENN domain-containing protein 5B
DESI1_HUMAN	Desumoylating isopeptidase 1
DEST_HUMAN	Destrin
DHB4_HUMAN	Peroxisomal multifunctional enzyme type 2
DHX32_HUMAN	Putative pre-mRNA-splicing factor ATP-dependent RNA helicase DHX32
DHX40_HUMAN	Probable ATP-dependent RNA helicase DHX40
DIAP3_HUMAN	Protein diaphanous homolog 3
DLGP5_HUMAN	Disks large-associated protein 5
DMD_HUMAN	Dystrophin
DMXL1_HUMAN	DmX-like protein 1
DMXL2_HUMAN	DmX-like protein 2
DNJA1_HUMAN	DnaJ homolog subfamily A member 1
DNJB1_HUMAN	DnaJ homolog subfamily B member 1
DNJB6_HUMAN	DnaJ homolog subfamily B member 6
DNJC2_HUMAN	DnaJ homolog subfamily C member 2
DNJC7_HUMAN	DnaJ homolog subfamily C member 7
DNLI1_HUMAN	DNA ligase 1
DNMBP_HUMAN	Dynamin-binding protein
DOCK1_HUMAN	Dedicator of cytokinesis protein 1
DPOA2_HUMAN	DNA polymerase alpha subunit B
DPOD1_HUMAN	DNA polymerase delta catalytic subunit
DPOD2_HUMAN	DNA polymerase delta subunit 2
DPOD3_HUMAN	DNA polymerase delta subunit 3
DPOLA_HUMAN	DNA polymerase alpha catalytic subunit
DTL_HUMAN	Denticleless protein homolog
DUS12_HUMAN	Dual specificity protein phosphatase 12
DUS3L_HUMAN	tRNA-dihydrouridine(47) synthase [NAD(P)(+)]-like
DVL2_HUMAN	Segment polarity protein dishevelled homolog DVL-2
DYR1A_HUMAN	Dual specificity tyrosine-phosphorylation-regulated kinase 1A
E41L1_HUMAN	Band 4.1-like protein 1
ECD_HUMAN	Protein ecdysoneless homolog
ECE2_HUMAN	Endothelin-converting enzyme 2
ECM29_HUMAN	Proteasome-associated protein ECM29 homolog
EDC3_HUMAN	Enhancer of mRNA-decapping protein 3
EDC4_HUMAN	Enhancer of mRNA-decapping protein 4
EDRF1_HUMAN	Erythroid differentiation-related factor 1
EF2K_HUMAN	Eukaryotic elongation factor 2 kinase
EGLN1_HUMAN	Egl nine homolog 1
EH1L1_HUMAN	EH domain-binding protein 1-like protein 1
EHBP1_HUMAN	EH domain-binding protein 1
EHD2_HUMAN	EH domain-containing protein 2
EI2BB_HUMAN	Translation initiation factor eIF-2B subunit beta
ELMO2_HUMAN	Engulfment and cell motility protein 2
ELP1_HUMAN	Elongator complex protein 1
ELP2_HUMAN	Elongator complex protein 2
ELP3_HUMAN	Elongator complex protein 3
ELP4_HUMAN	Elongator complex protein 4
ELP5_HUMAN	Elongator complex protein 5
EPS15_HUMAN	Epidermal growth factor receptor substrate 15
ERBIN_HUMAN	Erbin
ERC6L_HUMAN	DNA excision repair protein ERCC-6-like
ERF_HUMAN	ETS domain-containing transcription factor ERF
ERI1_HUMAN	3'-5' exoribonuclease 1
ES8L2_HUMAN	Epidermal growth factor receptor kinase substrate 8-like protein 2
ESYT1_HUMAN	Extended synaptotagmin-1
ESYT2_HUMAN	Extended synaptotagmin-2
EXOC1_HUMAN	Exocyst complex component 1
EXOC3_HUMAN	Exocyst complex component 3
EXOC4_HUMAN	Exocyst complex component 4
EXOC5_HUMAN	Exocyst complex component 5
EXOC6_HUMAN	Exocyst complex component 6
EXOC7_HUMAN	Exocyst complex component 7
EXOC8_HUMAN	Exocyst complex component 8
EYA3_HUMAN	Eyes absent homolog 3
EYA4_HUMAN	Eyes absent homolog 4
F102B_HUMAN	Protein FAM102B
F120B_HUMAN	Constitutive coactivator of peroxisome proliferator-activated receptor gamma
F120C_HUMAN	Constitutive coactivator of PPAR-gamma-like protein 2
F16B1_HUMAN	F16B1_HUMAN Protein FAM160B1
F199X_HUMAN	Protein FAM199X
F1T0I1_HUMAN	Protein transport protein Sec16A
F207A_HUMAN	Protein FAM207A
FA50B_HUMAN	Protein FAM50B
FA65A_HUMAN	Protein FAM65A
FA83D_HUMAN	Protein FAM83D
FACD2_HUMAN	Fanconi anemia group D2 protein
FAD1_HUMAN	FAD synthase
FADD_HUMAN	FAS-associated death domain protein
FAIM1_HUMAN	Fas apoptotic inhibitory molecule 1
FANCI_HUMAN	Fanconi anemia group I protein
FARP2_HUMAN	FERM, RhoGEF and pleckstrin domain-containing protein 2
FBLI1_HUMAN	Filamin-binding LIM protein 1
FBX30_HUMAN	F-box only protein 30
FBX4_HUMAN	F-box only protein 4
FBX7_HUMAN	F-box only protein 7
FEN1_HUMAN	Flap endonuclease 1
FHL3_HUMAN	Four and a half LIM domains protein 3
FHOD1_HUMAN	FH1/FH2 domain-containing protein 1
FIBP_HUMAN	Acidic fibroblast growth factor intracellular-binding protein
FIGL1_HUMAN	Fidgetin-like protein 1
FMNL3_HUMAN	Formin-like protein 3
FNBP1_HUMAN	Formin-binding protein 1
FND3A_HUMAN	Fibronectin type-III domain-containing protein 3A
FOLC_HUMAN	Folylpolyglutamate synthase, mitochondrial
FOXJ3_HUMAN	Forkhead box protein J3
FRG1_HUMAN	Protein FRG1
FRMD8_HUMAN	FERM domain-containing protein 8
FXL12_HUMAN	F-box/LRR-repeat protein 12
FXL18_HUMAN	F-box/LRR-repeat protein 18
GABPA_HUMAN	GA-binding protein alpha chain
GAK_HUMAN	Cyclin-G-associated kinase
GAPD1_HUMAN	GTPase-activating protein and VPS9 domain-containing protein 1
GBF1_HUMAN	Golgi-specific brefeldin A-resistance guanine nucleotide exchange factor 1
GCC2_HUMAN	GRIP and coiled-coil domain-containing protein 2
GCFC2_HUMAN	GC-rich sequence DNA-binding factor 2
GCN1_HUMAN	eIF-2-alpha kinase activator GCN1
GCP2_HUMAN	Gamma-tubulin complex component 2
GCP3_HUMAN	Gamma-tubulin complex component 3
GCP4_HUMAN	Gamma-tubulin complex component 4
GCP5_HUMAN	Gamma-tubulin complex component 5
GCR_HUMAN	Glucocorticoid receptor
GDAP2_HUMAN	Ganglioside-induced differentiation-associated protein 2
GDS1_HUMAN	Rap1 GTPase-GDP dissociation stimulator 1
GEMI4_HUMAN	Gem-associated protein 4
GEMI5_HUMAN	Gem-associated protein 5
GFPT1_HUMAN	Glutamine--fructose-6-phosphate aminotransferase [isomerizing] 1
GGA2_HUMAN	ADP-ribosylation factor-binding protein GGA2
GIPC1_HUMAN	PDZ domain-containing protein GIPC1
GIT2_HUMAN	ARF GTPase-activating protein GIT2
GLRX3_HUMAN	Glutaredoxin-3
GOGA1_HUMAN	Golgin subfamily A member 1
GOGA2_HUMAN	Golgin subfamily A member 2
GOLP3_HUMAN	Golgi phosphoprotein 3
GOPC_HUMAN	Golgi-associated PDZ and coiled-coil motif-containing protein
GPD1L_HUMAN	Glycerol-3-phosphate dehydrogenase 1-like protein
GPSM1_HUMAN	G-protein-signaling modulator 1
GRM1A_HUMAN	GRAM domain-containing protein 1A
GSH0_HUMAN	Glutamate--cysteine ligase regulatory subunit
GTPB3_HUMAN	tRNA modification GTPase GTPBP3, mitochondrial
GUAA_HUMAN	GMP synthase [glutamine-hydrolyzing]
GULP1_HUMAN	PTB domain-containing engulfment adapter protein 1
GWL_HUMAN	Serine/threonine-protein kinase greatwall
HAUS1_HUMAN	HAUS augmin-like complex subunit 1
HAUS3_HUMAN	HAUS augmin-like complex subunit 3
HAUS4_HUMAN	HAUS augmin-like complex subunit 4
HAUS5_HUMAN	HAUS augmin-like complex subunit 5
HAUS6_HUMAN	HAUS augmin-like complex subunit 6
HAUS7_HUMAN	HAUS augmin-like complex subunit 7
HAUS8_HUMAN	HAUS augmin-like complex subunit 8
HAX1_HUMAN	HCLS1-associated protein X-1
HBS1L_HUMAN	HBS1-like protein
HEAT3_HUMAN	HEAT repeat-containing protein 3
HECD1_HUMAN	E3 ubiquitin-protein ligase HECTD1
HEM3_HUMAN	Porphobilinogen deaminase
HERC4_HUMAN	Probable E3 ubiquitin-protein ligase HERC4
HGH1_HUMAN	Protein HGH1 homolog
HGS_HUMAN	Hepatocyte growth factor-regulated tyrosine kinase substrate
HIP1R_HUMAN	Huntingtin-interacting protein 1-related protein
HM20B_HUMAN	SWI/SNF-related matrix-associated actin-dependent regulator of chromatin subfamily E member 1-related
HMCES_HUMAN	Embryonic stem cell-specific 5-hydroxymethylcytosine-binding protein
HMMR_HUMAN	Hyaluronan mediated motility receptor
HNRLL_HUMAN	Heterogeneous nuclear ribonucleoprotein L-like
HOOK1_HUMAN	Protein Hook homolog 1
HPBP1_HUMAN	Hsp70-binding protein 1
HPF1_HUMAN	Histone PARylation factor 1
HPS3_HUMAN	Hermansky-Pudlak syndrome 3 protein
HSF1_HUMAN	Heat shock factor protein 1
HSP7E_HUMAN	Heat shock 70 kDa protein 14
HSPB1_HUMAN	Heat shock protein beta-1
HSPB8_HUMAN	Heat shock protein beta-8
HTF4_HUMAN	Transcription factor 12
HUS1_HUMAN	Checkpoint protein HUS1
HUWE1_HUMAN	E3 ubiquitin-protein ligase HUWE1
I2BP1_HUMAN	Interferon regulatory factor 2-binding protein 1
I2BPL_HUMAN	Interferon regulatory factor 2-binding protein-like
I5P2_HUMAN	Type II inositol 1,4,5-trisphosphate 5-phosphatase
ICLN_HUMAN	Methylosome subunit pICln
IDI1_HUMAN	Isopentenyl-diphosphate Delta-isomerase 1
IF122_HUMAN	Intraflagellar transport protein 122 homolog
IF4G2_HUMAN	Eukaryotic translation initiation factor 4 gamma 2
IF4G3_HUMAN	Eukaryotic translation initiation factor 4 gamma 3
IF5A1_HUMAN	Eukaryotic translation initiation factor 5A-1
IFIT1_HUMAN	IFIT1_HUMAN Interferon-induced protein with tetratricopeptide repeats 1
IFIT2_HUMAN	Interferon-induced protein with tetratricopeptide repeats 2
IFIT3_HUMAN	Interferon-induced protein with tetratricopeptide repeats 3
IFIT5_HUMAN	Interferon-induced protein with tetratricopeptide repeats 5
IFRD1_HUMAN	Interferon-related developmental regulator 1
IFRD2_HUMAN	Interferon-related developmental regulator 2
IKKA_HUMAN	Inhibitor of nuclear factor kappa-B kinase subunit alpha
IKKB_HUMAN	Inhibitor of nuclear factor kappa-B kinase subunit beta
IL18_HUMAN	Interleukin-18
ILK_HUMAN	Integrin-linked protein kinase
ILKAP_HUMAN	Integrin-linked kinase-associated serine/threonine phosphatase 2C
INADL_HUMAN	InaD-like protein
INF2_HUMAN	Inverted formin-2
INP4A_HUMAN	Type I inositol 3,4-bisphosphate 4-phosphatase
INT7_HUMAN	Integrator complex subunit 7
IPO4_HUMAN	Importin-4
IPO5_HUMAN	Importin-5
IPO7_HUMAN	Importin-7
IPO8_HUMAN	Importin-8 OS=Homo sapiens GN=IPO8 PE=1 SV=2
IPO9_HUMAN	Importin-9
IPRI_HUMAN	Inositol 1,4,5-trisphosphate receptor-interacting protein
IQGA3_HUMAN	Ras GTPase-activating-like protein IQGAP3
IRF3_HUMAN	Interferon regulatory factor 3
ITCH_HUMAN	E3 ubiquitin-protein ligase Itchy homolog
ITPA_HUMAN	Inosine triphosphate pyrophosphatase
JAK1_HUMAN	Tyrosine-protein kinase JAK1
JMJD6_HUMAN	Bifunctional arginine demethylase and lysyl-hydroxylase JMJD6
K2C80_HUMAN	Keratin, type II cytoskeletal 80
KALRN_HUMAN	Kalirin
KANK2_HUMAN	KN motif and ankyrin repeat domain-containing protein 2
KAT8_HUMAN	Histone acetyltransferase KAT8
KBP_HUMAN	KIF1-binding protein
KBTB2_HUMAN	Kelch repeat and BTB domain-containing protein 2
KBTB4_HUMAN	Kelch repeat and BTB domain-containing protein 4
KCC1D_HUMAN	Calcium/calmodulin-dependent protein kinase type 1D
KCC4_HUMAN	Calcium/calmodulin-dependent protein kinase type IV
KCTD3_HUMAN	BTB/POZ domain-containing protein KCTD3
KCY_HUMAN	UMP-CMP kinase
KDM3B_HUMAN	Lysine-specific demethylase 3B
KDM5C_HUMAN	Lysine-specific demethylase 5C
KI21A_HUMAN	Kinesin-like protein KIF21A
KIBRA_HUMAN	Protein KIBRA
KIF11_HUMAN	Kinesin-like protein KIF11
KIF14_HUMAN	Kinesin-like protein KIF14
KIF1B_HUMAN	Kinesin-like protein KIF1B
KIF2C_HUMAN	Kinesin-like protein KIF2C
KITH_HUMAN	Thymidine kinase, cytosolic
KKCC2_HUMAN	Calcium/calmodulin-dependent protein kinase kinase 2
KLF16_HUMAN	Krueppel-like factor 16
KLF4_HUMAN	Krueppel-like factor 4
KLH11_HUMAN	Kelch-like protein 11
KNTC1_HUMAN	Kinetochore-associated protein 1
KPCD_HUMAN	Protein kinase C delta type
KPCI_HUMAN	Protein kinase C iota type
KS6A1_HUMAN	Ribosomal protein S6 kinase alpha-1
KS6A2_HUMAN	Ribosomal protein S6 kinase alpha-2
KS6A3_HUMAN	Ribosomal protein S6 kinase alpha-3
KS6A4_HUMAN	Ribosomal protein S6 kinase alpha-4
KS6A6_HUMAN	Ribosomal protein S6 kinase alpha-6
KTI12_HUMAN	Protein KTI12 homolog
KTNB1_HUMAN	Katanin p80 WD40 repeat-containing subunit B1
LEO1_HUMAN	RNA polymerase-associated protein LEO1
LIN9_HUMAN	Protein lin-9 homolog
LIPA1_HUMAN	Liprin-alpha-1
LIPA2_HUMAN	Liprin-alpha-2
LIPB1_HUMAN	Liprin-beta-1
LLR1_HUMAN	Leucine-rich repeat protein 1
LRC40_HUMAN	Leucine-rich repeat-containing protein 40
LRC41_HUMAN	Leucine-rich repeat-containing protein 41
LST8_HUMAN	Target of rapamycin complex subunit LST8
LTN1_HUMAN	E3 ubiquitin-protein ligase listerin
LZTR1_HUMAN	Leucine-zipper-like transcriptional regulator 1
M0R3A8_HUMAN	PIH1 domain-containing protein 1 (Fragment)
M1IP1_HUMAN	Mid1-interacting protein 1
M3K6_HUMAN	Mitogen-activated protein kinase kinase kinase 6
M3K7_HUMAN	Mitogen-activated protein kinase kinase kinase 7
M4K4_HUMAN	Mitogen-activated protein kinase kinase kinase kinase 4
MA7D1_HUMAN	MAP7 domain-containing protein 1
MADD_HUMAN	MAP kinase-activating death domain protein
MAEA_HUMAN	Macrophage erythroblast attacher
MAF1_HUMAN	Repressor of RNA polymerase III transcription MAF1 homolog
MAGD2_HUMAN	Melanoma-associated antigen D2
MALT1_HUMAN	Mucosa-associated lymphoid tissue lymphoma translocation protein 1
MAPK3_HUMAN	MAP kinase-activated protein kinase 3
MARC2_HUMAN	Mitochondrial amidoxime reducing component 2
MARE2_HUMAN	Microtubule-associated protein RP/EB family member 2
MCAF1_HUMAN	Activating transcription factor 7-interacting protein 1
MCE1_HUMAN	mRNA-capping enzyme
MCMBP_HUMAN	Mini-chromosome maintenance complex-binding protein
MED14_HUMAN	Mediator of RNA polymerase II transcription subunit 14
MED15_HUMAN	Mediator of RNA polymerase II transcription subunit 15
MED17_HUMAN	Mediator of RNA polymerase II transcription subunit 17
MED18_HUMAN	Mediator of RNA polymerase II transcription subunit 18
MED27_HUMAN	Mediator of RNA polymerase II transcription subunit 27
MET13_HUMAN	Methyltransferase-like protein 13
MET2B_HUMAN	Methyltransferase-like protein 2B
METH_HUMAN	Methionine synthase
MFN1_HUMAN	Mitofusin-1
MGMT_HUMAN	Methylated-DNA--protein-cysteine methyltransferase
MI4GD_HUMAN	MIF4G domain-containing protein
MIP18_HUMAN	Mitotic spindle-associated MMXD complex subunit MIP18
MK09_HUMAN	Mitogen-activated protein kinase 9
MK14_HUMAN	Mitogen-activated protein kinase 14
MKNK1_HUMAN	MAP kinase-interacting serine/threonine-protein kinase 1
MKRN2_HUMAN	Probable E3 ubiquitin-protein ligase makorin-2
MLH1_HUMAN	DNA mismatch repair protein Mlh1
MLTK_HUMAN	Mitogen-activated protein kinase kinase kinase MLT
MMS19_HUMAN	MMS19 nucleotide excision repair protein homolog
MOC2B_HUMAN	Molybdopterin synthase catalytic subunit
MOD5_HUMAN	tRNA dimethylallyltransferase, mitochondrial
MOFA1_HUMAN	MORF4 family-associated protein 1
MON2_HUMAN	Protein MON2 homolog
MORC3_HUMAN	MORC family CW-type zinc finger protein 3
MPDZ_HUMAN	Multiple PDZ domain protein
MPP5_HUMAN	MAGUK p55 subfamily member 5
MPP6_HUMAN	MAGUK p55 subfamily member 6 ¡
MRCKA_HUMAN	Serine/threonine-protein kinase MRCK alpha
MTCL1_HUMAN	Microtubule cross-linking factor 1
MTMRE_HUMAN	Myotubularin-related protein 14
MTNA_HUMAN	Methylthioribose-1-phosphate isomerase
MTOR_HUMAN	Serine/threonine-protein kinase mTOR
MYO10_HUMAN	Unconventional myosin-X
MYPN_HUMAN	Myopalladin
NAA35_HUMAN	N-alpha-acetyltransferase 35, NatC auxiliary subunit
NAB2_HUMAN	NGFI-A-binding protein 2
NACC1_HUMAN	Nucleus accumbens-associated protein 1
NADAP_HUMAN	Kanadaptin
NAV1_HUMAN	Neuron navigator 1
NCDN_HUMAN	Neurochondrin
NCK1_HUMAN	Cytoplasmic protein NCK1
NCOA7_HUMAN	Nuclear receptor coactivator 7
NCOR2_HUMAN	Nuclear receptor corepressor 2
NDC80_HUMAN	Kinetochore protein NDC80 homolog
NDK7_HUMAN	Nucleoside diphosphate kinase 7
NED4L_HUMAN	E3 ubiquitin-protein ligase NEDD4-like
NEDD1_HUMAN	Protein NEDD1
NEK7_HUMAN	Serine/threonine-protein kinase Nek7
NEK9_HUMAN	Serine/threonine-protein kinase Nek9
NELFA_HUMAN	Negative elongation factor A
NELFB_HUMAN	Negative elongation factor B
NELFD_HUMAN	Negative elongation factor C/D
NEMO_HUMAN	NF-kappa-B essential modulator
NFKB1_HUMAN	Nuclear factor NF-kappa-B p105 subunit
NFKB2_HUMAN	Nuclear factor NF-kappa-B p100 subunit
NHLC2_HUMAN	NHL repeat-containing protein 2
NJMU_HUMAN	Protein Njmu-R1
NMD3_HUMAN	60S ribosomal export protein NMD3
NOSIP_HUMAN	Nitric oxide synthase-interacting protein
NOTC2_HUMAN	Neurogenic locus notch homolog protein 2
NPRL3_HUMAN	Nitrogen permease regulator 3-like protein
NRDC_HUMAN	Nardilysin
NRDE2_HUMAN	Protein NRDE2 homolog
NS1BP_HUMAN	Influenza virus NS1A-binding protein
NUB1_HUMAN	NEDD8 ultimate buster 1
NUDC2_HUMAN	NudC domain-containing protein 2
NUDT4_HUMAN	Diphosphoinositol polyphosphate phosphohydrolase 2
NUF2_HUMAN	Kinetochore protein Nuf2
NUMBL_HUMAN	Numb-like protein
NXN_HUMAN	Nucleoredoxin
OCRL_HUMAN	Inositol polyphosphate 5-phosphatase OCRL-1
OGA_HUMAN	Protein O-GlcNAcase
OGFR_HUMAN	Opioid growth factor receptor
ORC6_HUMAN	Origin recognition complex subunit 6
OSB10_HUMAN	Oxysterol-binding protein-related protein 10
OSBL1_HUMAN	Oxysterol-binding protein-related protein 1
OSBL2_HUMAN	Oxysterol-binding protein-related protein 2
OTUD5_HUMAN	OTU domain-containing protein 5
OTUL_HUMAN	Ubiquitin thioesterase otulin
P3C2A_HUMAN	Phosphatidylinositol 4-phosphate 3-kinase C2 domain-containing subunit alpha
P4R3B_HUMAN	Serine/threonine-protein phosphatase 4 regulatory subunit 3B
PA1B2_HUMAN	Platelet-activating factor acetylhydrolase IB subunit beta
PA24A_HUMAN	Cytosolic phospholipase A2
PACS1_HUMAN	Phosphofurin acidic cluster sorting protein 1
PAF1_HUMAN	RNA polymerase II-associated factor 1 homolog
PALLD_HUMAN	Palladin
PAPOG_HUMAN	Poly(A) polymerase gamma
PARP4_HUMAN	Poly [ADP-ribose] polymerase 4
PATL1_HUMAN	Protein PAT1 homolog 1
PATZ1_HUMAN	POZ-, AT hook-, and zinc finger-containing protein 1
PCBP1_HUMAN	Poly(rC)-binding protein 1
PCBP2_HUMAN	Poly(rC)-binding protein 2
PCBP3_HUMAN	Poly(rC)-binding protein 3 ¡
PCNA_HUMAN	Proliferating cell nuclear antigen
PDD2L_HUMAN	Programmed cell death protein 2-like
PDE3A_HUMAN	cGMP-inhibited 3',5'-cyclic phosphodiesterase A
PDE4B_HUMAN	cAMP-specific 3',5'-cyclic phosphodiesterase 4B
PDE4D_HUMAN	cAMP-specific 3',5'-cyclic phosphodiesterase 4D
PDE8B_HUMAN	High affinity cAMP-specific and IBMX-insensitive 3',5'-cyclic phosphodiesterase 8B
PDPK1_HUMAN	3-phosphoinositide-dependent protein kinase 1
PDXD1_HUMAN	Pyridoxal-dependent decarboxylase domain-containing protein 1
PDXD2_HUMAN	Putative pyridoxal-dependent decarboxylase domain-containing protein 2
PEA15_HUMAN	Astrocytic phosphoprotein PEA-15
PEG10_HUMAN	Retrotransposon-derived protein PEG10
PELO_HUMAN	Protein pelota homolog
PEX3_HUMAN	Peroxisomal biogenesis factor 3
PEX5_HUMAN	Peroxisomal targeting signal 1 receptor
PGTB2_HUMAN	Geranylgeranyl transferase type-2 subunit beta
PHKG2_HUMAN	Phosphorylase b kinase gamma catalytic chain, liver/testis isoform
PHLA2_HUMAN	Pleckstrin homology-like domain family A member 2
PHLB1_HUMAN	Pleckstrin homology-like domain family B member 1
PHLB2_HUMAN	Pleckstrin homology-like domain family B member 2
PHLP_HUMAN	Phosducin-like protein
PI3R4_HUMAN	Phosphoinositide 3-kinase regulatory subunit 4
PI42C_HUMAN	Phosphatidylinositol 5-phosphate 4-kinase type-2 gamma
PI4KA_HUMAN	Phosphatidylinositol 4-kinase alpha
PIAS4_HUMAN	E3 SUMO-protein ligase PIAS4
PIR_HUMAN	Pirin
PK3C3_HUMAN	Phosphatidylinositol 3-kinase catalytic subunit type 3
PKHA2_HUMAN	Pleckstrin homology domain-containing family A member 2
PKHA5_HUMAN	Pleckstrin homology domain-containing family A member 5
PLAP_HUMAN	Phospholipase A-2-activating protein
PLK1_HUMAN	Serine/threonine-protein kinase PLK1
PMM1_HUMAN	Phosphomannomutase 1
PMS1_HUMAN	PMS1 protein homolog 1
PMVK_HUMAN	Phosphomevalonate kinase
PMYT1_HUMAN	Membrane-associated tyrosine- and threonine-specific cdc2-inhibitory kinase
POSTN_HUMAN	Periostin
PP4R2_HUMAN	Serine/threonine-protein phosphatase 4 regulatory subunit 2
PP6R1_HUMAN	Serine/threonine-protein phosphatase 6 regulatory subunit 1
PP6R3_HUMAN	Serine/threonine-protein phosphatase 6 regulatory subunit 3
PPAC_HUMAN	Low molecular weight phosphotyrosine protein phosphatase
PPID_HUMAN	Peptidyl-prolyl cis-trans isomerase D
PPIL2_HUMAN	Peptidyl-prolyl cis-trans isomerase-like 2
PPR35_HUMAN	Protein phosphatase 1 regulatory subunit 35
PRC2B_HUMAN	Protein PRRC2B
PRI1_HUMAN	DNA primase small subunit
PRI2_HUMAN	DNA primase large subunit
PRP39_HUMAN	Pre-mRNA-processing factor 39
PRR11_HUMAN	Proline-rich protein 11
PRS6A_HUMAN	26S protease regulatory subunit 6A
PRS6B_HUMAN	26S protease regulatory subunit 6B
PRS7_HUMAN	26S protease regulatory subunit 7
PSA4_HUMAN	Proteasome subunit alpha type-4
PSA5_HUMAN	Proteasome subunit alpha type-5
PSB2_HUMAN	Proteasome subunit beta type-2
PSD10_HUMAN	26S proteasome non-ATPase regulatory subunit 10
PSD11_HUMAN	26S proteasome non-ATPase regulatory subunit 11
PSD12_HUMAN	26S proteasome non-ATPase regulatory subunit 12
PSD13_HUMAN	26S proteasome non-ATPase regulatory subunit 13
PSDE_HUMAN	26S proteasome non-ATPase regulatory subunit 14
PSF2_HUMAN	DNA replication complex GINS protein PSF2
PSMD2_HUMAN	26S proteasome non-ATPase regulatory subunit 2
PSMD3_HUMAN	26S proteasome non-ATPase regulatory subunit 3
PSMD6_HUMAN	26S proteasome non-ATPase regulatory subunit 6
PSMD8_HUMAN	26S proteasome non-ATPase regulatory subunit 8
PSMG2_HUMAN	Proteasome assembly chaperone 2
PTEN_HUMAN	Phosphatidylinositol 3,4,5-trisphosphate 3-phosphatase and dual-specificity protein phosphatase PTEN
PTN12_HUMAN	Tyrosine-protein phosphatase non-receptor type 12
PUS7_HUMAN	Pseudouridylate synthase 7 homolog
PUS7L_HUMAN	Pseudouridylate synthase 7 homolog-like protein
PYRD1_HUMAN	Pyridine nucleotide-disulfide oxidoreductase domain-containing protein 1
Q5T1Z8_HUMAN	Pumilio homolog 1
QRIC1_HUMAN	Glutamine-rich protein 1
QSER1_HUMAN	Glutamine and serine-rich protein 1
QTRT2_HUMAN	Queuine tRNA-ribosyltransferase accessory subunit 2
R4GNB2_HUMAN	DENN domain-containing protein 4C
RAB24_HUMAN	Ras-related protein Rab-24
RABE2_HUMAN	Rab GTPase-binding effector protein 2
RABX5_HUMAN	Rab5 GDP/GTP exchange factor
RAD1_HUMAN	Cell cycle checkpoint protein RAD1
RAF1_HUMAN	RAF proto-oncogene serine/threonine-protein kinase
RANB9_HUMAN	Ran-binding protein 9
RASA1_HUMAN	Ras GTPase-activating protein 1
RB3GP_HUMAN	Rab3 GTPase-activating protein catalytic subunit
RBGP1_HUMAN	Rab GTPase-activating protein 1
RBM12_HUMAN	RNA-binding protein 12
RBM4B_HUMAN	RNA-binding protein 4B
RBP1_HUMAN	RalA-binding protein 1
RBPMS_HUMAN	RNA-binding protein with multiple splicing
RCCD1_HUMAN	RCC1 domain-containing protein 1
REL_HUMAN	Proto-oncogene c-Rel
REPS2_HUMAN	RalBP1-associated Eps domain-containing protein 2
RETST_HUMAN	All-trans-retinol 13,14-reductase
RHG05_HUMAN	Rho GTPase-activating protein 5
RHG21_HUMAN	Rho GTPase-activating protein 21
RHG29_HUMAN	Rho GTPase-activating protein 29
RHG35_HUMAN	Rho GTPase-activating protein 35
RIC8A_HUMAN	Synembryn-A
RICTR_HUMAN	Rapamycin-insensitive companion of mTOR
RIN1_HUMAN	Ras and Rab interactor 1
RINI_HUMAN	Ribonuclease inhibitor
RINT1_HUMAN	RAD50-interacting protein 1
RIOK2_HUMAN	Serine/threonine-protein kinase RIO2
RIPK1_HUMAN	Receptor-interacting serine/threonine-protein kinase 1
RIR1_HUMAN	Ribonucleoside-diphosphate reductase large subunit
RIR2_HUMAN	Ribonucleoside-diphosphate reductase subunit M2
RLGPB_HUMAN	Ral GTPase-activating protein subunit beta
RN213_HUMAN	E3 ubiquitin-protein ligase RNF213
RN216_HUMAN	E3 ubiquitin-protein ligase RNF216
RN220_HUMAN	E3 ubiquitin-protein ligase RNF220
RNBP6_HUMAN	Ran-binding protein 6
RNF14_HUMAN	E3 ubiquitin-protein ligase RNF14
RNH1_HUMAN	Ribonuclease H1
RNH2B_HUMAN	Ribonuclease H2 subunit B
RO52_HUMAN	E3 ubiquitin-protein ligase TRIM21
ROR2_HUMAN	Tyrosine-protein kinase transmembrane receptor ROR2
RPAP1_HUMAN	RNA polymerase II-associated protein 1
RPAP2_HUMAN	Putative RNA polymerase II subunit B1 CTD phosphatase RPAP2
RPC1_HUMAN	DNA-directed RNA polymerase III subunit RPC1
RPC2_HUMAN	DNA-directed RNA polymerase III subunit RPC2
RPC4_HUMAN	DNA-directed RNA polymerase III subunit RPC4
RPC5_HUMAN	DNA-directed RNA polymerase III subunit RPC5
RPGF6_HUMAN	Rap guanine nucleotide exchange factor 6
RRP44_HUMAN	Exosome complex exonuclease RRP44
RTF2_HUMAN	Protein RTF2 homolog
RUFY1_HUMAN	RUN and FYVE domain-containing protein 1
S10A2_HUMAN	Protein S100-A2
S23IP_HUMAN	SEC23-interacting protein
SAAL1_HUMAN	Protein SAAL1
SACS_HUMAN	Sacsin
SAHH2_HUMAN	Adenosylhomocysteinase 2
SAM11_HUMAN	Sterile alpha motif domain-containing protein 11
SAMD9_HUMAN	Sterile alpha motif domain-containing protein 9
SAR1A_HUMAN	GTP-binding protein SAR1a
SBDS_HUMAN	Ribosome maturation protein SBDS
SC16A_HUMAN	Protein transport protein Sec16A
SC24B_HUMAN	Protein transport protein Sec24B
SC24D_HUMAN	Protein transport protein Sec24D
SC31A_HUMAN	Protein transport protein Sec31A
SDCB1_HUMAN	Syntenin-1
SELB_HUMAN	Selenocysteine-specific elongation factor
SEN34_HUMAN	tRNA-splicing endonuclease subunit Sen34
SERA_HUMAN	D-3-phosphoglycerate dehydrogenase
SET1B_HUMAN	Histone-lysine N-methyltransferase SETD1B
SETB1_HUMAN	Histone-lysine N-methyltransferase SETDB1
SGT1_HUMAN	Protein SGT1 homolog
SH24A_HUMAN	SH2 domain-containing protein 4A
SH319_HUMAN	SH3 domain-containing protein 19
SH3B4_HUMAN	SH3 domain-binding protein 4
SH3G1_HUMAN	Endophilin-A2
SH3R1_HUMAN	E3 ubiquitin-protein ligase SH3RF1
SHC1_HUMAN	SHC-transforming protein 1
SHIP2_HUMAN	Phosphatidylinositol 3,4,5-trisphosphate 5-phosphatase 2
SHLB1_HUMAN	Endophilin-B1
SHLB2_HUMAN	Endophilin-B2
SIN1_HUMAN	Target of rapamycin complex 2 subunit MAPKAP1
SKA1_HUMAN	Spindle and kinetochore-associated protein 1
SKA3_HUMAN	Spindle and kinetochore-associated protein 3
SKAP_HUMAN	Small kinetochore-associated protein
SKIV2_HUMAN	Helicase SKI2W
SKP2_HUMAN	S-phase kinase-associated protein 2
SKT_HUMAN	Sickle tail protein homolog
SMAD3_HUMAN	Mothers against decapentaplegic homolog 3
SMAD4_HUMAN	Mothers against decapentaplegic homolog 4
SMAG2_HUMAN	Protein Smaug homolog 2
SMAP2_HUMAN	Stromal membrane-associated protein 2
SMC4_HUMAN	Structural maintenance of chromosomes protein 4
SMG7_HUMAN	Protein SMG7
SMRCD_HUMAN	SWI/SNF-related matrix-associated actin-dependent regulator of chromatin subfamily A containing DEAD/H box 1
SND1_HUMAN	Staphylococcal nuclease domain-containing protein 1
SNPC4_HUMAN	snRNA-activating protein complex subunit 4
SNTA1_HUMAN	Alpha-1-syntrophin
SNX17_HUMAN	Sorting nexin-17
SNX18_HUMAN	Sorting nexin-18
SNX27_HUMAN	Sorting nexin-27
SNX3_HUMAN	Sorting nexin-3
SNX33_HUMAN	Sorting nexin-33
SNX4_HUMAN	Sorting nexin-4
SNX8_HUMAN	Sorting nexin-8
SNX9_HUMAN	Sorting nexin-9
SPAG5_HUMAN	Sperm-associated antigen 5
SPC24_HUMAN	Kinetochore protein Spc24
SPC25_HUMAN	Kinetochore protein Spc25
SPD2B_HUMAN	SH3 and PX domain-containing protein 2B
SPDLY_HUMAN	Protein Spindly
SPE39_HUMAN	Spermatogenesis-defective protein 39 homolog
SPEE_HUMAN	Spermidine synthase
SPG20_HUMAN	Spartin
SPTC1_HUMAN	Serine palmitoyltransferase 1
ST1A1_HUMAN	Sulfotransferase 1A1
ST38L_HUMAN	Serine/threonine-protein kinase 38-like
STA5B_HUMAN	Signal transducer and activator of transcription 5B
STALP_HUMAN	AMSH-like protease
STAT1_HUMAN	Signal transducer and activator of transcription 1-alpha/beta
STAT3_HUMAN	Signal transducer and activator of transcription 3
STAT6_HUMAN	Signal transducer and activator of transcription 6
STK38_HUMAN	Serine/threonine-protein kinase 38
STK39_HUMAN	STE20/SPS1-related proline-alanine-rich protein kinase
STPAP_HUMAN	Speckle targeted PIP5K1A-regulated poly(A) polymerase
STRP1_HUMAN	Striatin-interacting protein 1
STX5_HUMAN	Syntaxin-5
STXB3_HUMAN	Syntaxin-binding protein 3
STXB4_HUMAN	Syntaxin-binding protein 4
SUMO2_HUMAN	Small ubiquitin-related modifier 2
SURF2_HUMAN	Surfeit locus protein 2
SYEP_HUMAN	Bifunctional glutamate/proline--tRNA ligase
SYLC_HUMAN	Leucine--tRNA ligase, cytoplasmic
SYMC_HUMAN	Methionine--tRNA ligase, cytoplasmic
SYNCI_HUMAN	Syncoilin
SYYC_HUMAN	Tyrosine--tRNA ligase, cytoplasmic
T2EB_HUMAN	Transcription initiation factor IIE subunit beta
TAB2_HUMAN	TGF-beta-activated kinase 1 and MAP3K7-binding protein 2
TACC1_HUMAN	Transforming acidic coiled-coil-containing protein 1
TAF6L_HUMAN	TAF6-like RNA polymerase II p300/CBP-associated factor-associated factor 65 kDa subunit 6L
TANC1_HUMAN	Protein TANC1
TANC2_HUMAN	Protein TANC2
TARA_HUMAN	TRIO and F-actin-binding protein
TAXB1_HUMAN	Tax1-binding protein 1
TB10A_HUMAN	TBC1 domain family member 10A
TBB3_HUMAN	Tubulin beta-3 chain
TBC13_HUMAN	TBC1 domain family member 13
TBC15_HUMAN	TBC1 domain family member 15
TBC17_HUMAN	TBC1 domain family member 17
TBC9B_HUMAN	TBC1 domain family member 9B
TBCB_HUMAN	Tubulin-folding cofactor B
TBCD_HUMAN	Tubulin-specific chaperone D
TBCD4_HUMAN	TBC1 domain family member 4
TBCE_HUMAN	Tubulin-specific chaperone E
TBD2A_HUMAN	TBC1 domain family member 2A
TBD2B_HUMAN	TBC1 domain family member 2B
TBG1_HUMAN	Tubulin gamma-1 chain
TBG2_HUMAN	Tubulin gamma-2 chain
TBK1_HUMAN	Serine/threonine-protein kinase TBK1
TBPL1_HUMAN	TATA box-binding protein-like protein 1
TCAF1_HUMAN	TRPM8 channel-associated factor 1
TDRD7_HUMAN	Tudor domain-containing protein 7
TEBP_HUMAN	Prostaglandin E synthase 3
TELO2_HUMAN	Telomere length regulation protein TEL2 homolog
TENS3_HUMAN	Tensin-3
TEX30_HUMAN	Testis-expressed sequence 30 protein
TF65_HUMAN	Transcription factor p65
TGFI1_HUMAN	Transforming growth factor beta-1-induced transcript 1 protein
THTM_HUMAN	3-mercaptopyruvate sulfurtransferase
THUM3_HUMAN	THUMP domain-containing protein 3
TIFA_HUMAN	TRAF-interacting protein with FHA domain-containing protein A
TIGAR_HUMAN	Fructose-2,6-bisphosphatase TIGAR
TIPRL_HUMAN	TIP41-like protein
TLK2_HUMAN	Serine/threonine-protein kinase tousled-like 2
TMF1_HUMAN	TATA element modulatory factor
TNAP2_HUMAN	Tumor necrosis factor alpha-induced protein 2
TNIP1_HUMAN	TNFAIP3-interacting protein 1
TNPO2_HUMAN	Transportin-2
TNR6B_HUMAN	Trinucleotide repeat-containing gene 6B protein
TOPK_HUMAN	Lymphokine-activated killer T-cell-originated protein kinase
TPC12_HUMAN	Trafficking protein particle complex subunit 12
TPC2L_HUMAN	Trafficking protein particle complex subunit 2-like protein
TPPC3_HUMAN	Trafficking protein particle complex subunit 3
TPPC4_HUMAN	Trafficking protein particle complex subunit 4
TPPC8_HUMAN	Trafficking protein particle complex subunit 8
TR16L_HUMAN	Tripartite motif-containing protein 16-like protein
TRAD1_HUMAN	TRAF-type zinc finger domain-containing protein 1
TRADD_HUMAN	Tumor necrosis factor receptor type 1-associated DEATH domain protein
TRAF2_HUMAN	TNF receptor-associated factor 2
TRDMT_HUMAN	tRNA (cytosine(38)-C(5))-methyltransferase
TRI16_HUMAN	Tripartite motif-containing protein 16
TRI18_HUMAN	E3 ubiquitin-protein ligase Midline-1
TRI25_HUMAN	E3 ubiquitin/ISG15 ligase TRIM25
TRI32_HUMAN	E3 ubiquitin-protein ligase TRIM32
TRI33_HUMAN	E3 ubiquitin-protein ligase TRIM33
TRI37_HUMAN	E3 ubiquitin-protein ligase TRIM37
TRI47_HUMAN	Tripartite motif-containing protein 47
TRIO_HUMAN	Triple functional domain protein
TRIP6_HUMAN	Thyroid receptor-interacting protein 6
TRIPB_HUMAN	Thyroid receptor-interacting protein 11
TRM7_HUMAN	Putative tRNA (cytidine(32)/guanosine(34)-2'-O)-methyltransferase
TRPM6_HUMAN	Transient receptor potential cation channel subfamily M member 6
TRUB1_HUMAN	Probable tRNA pseudouridine synthase 1
TS101_HUMAN	Tumor susceptibility gene 101 protein
TSAP1_HUMAN	tRNA selenocysteine 1-associated protein 1
TSR1_HUMAN	Pre-rRNA-processing protein TSR1 homolog
TSYL1_HUMAN	Testis-specific Y-encoded-like protein 1
TTC27_HUMAN	Tetratricopeptide repeat protein 27
TTC28_HUMAN	Tetratricopeptide repeat protein 28
TTC37_HUMAN	Tetratricopeptide repeat protein 37
TTC4_HUMAN	Tetratricopeptide repeat protein 4
TTC5_HUMAN	Tetratricopeptide repeat protein 5
TTF2_HUMAN	Transcription termination factor 2
TTI1_HUMAN	TELO2-interacting protein 1 homolog
TTI2_HUMAN	TTI2_HUMAN TELO2-interacting protein 2
TTK_HUMAN	Dual specificity protein kinase TTK
TTL12_HUMAN	Tubulin--tyrosine ligase-like protein 12
TUT4_HUMAN	Terminal uridylyltransferase 4
TX1B3_HUMAN	Tax1-binding protein 3
TXNL1_HUMAN	Thioredoxin-like protein 1
TYDP1_HUMAN	Tyrosyl-DNA phosphodiesterase 1
TYDP2_HUMAN	Tyrosyl-DNA phosphodiesterase 2
TYK2_HUMAN	Non-receptor tyrosine-protein kinase TYK2
TYSY_HUMAN	Thymidylate synthase
TYW1_HUMAN	S-adenosyl-L-methionine-dependent tRNA 4-demethylwyosine synthase
U119B_HUMAN	Protein unc-119 homolog B
UACA_HUMAN	Uveal autoantigen with coiled-coil domains and ankyrin repeats
UB2D3_HUMAN	Ubiquitin-conjugating enzyme E2 D3
UB2G2_HUMAN	Ubiquitin-conjugating enzyme E2 G2
UB2Q1_HUMAN	Ubiquitin-conjugating enzyme E2 Q1
UB2R1_HUMAN	Ubiquitin-conjugating enzyme E2 R1
UBAC1_HUMAN	Ubiquitin-associated domain-containing protein 1
UBAP1_HUMAN	Ubiquitin-associated protein 1
UBE2C_HUMAN	Ubiquitin-conjugating enzyme E2 C
UBE3C_HUMAN	Ubiquitin-protein ligase E3C
UBP11_HUMAN	Ubiquitin carboxyl-terminal hydrolase 11
UBP13_HUMAN	Ubiquitin carboxyl-terminal hydrolase 13
UBP15_HUMAN	Ubiquitin carboxyl-terminal hydrolase 15
UBP3_HUMAN	Ubiquitin carboxyl-terminal hydrolase 3
UBP4_HUMAN	Ubiquitin carboxyl-terminal hydrolase 4
UBP47_HUMAN	Ubiquitin carboxyl-terminal hydrolase 47
UBP48_HUMAN	Ubiquitin carboxyl-terminal hydrolase 48
UBR1_HUMAN	E3 ubiquitin-protein ligase UBR1
UBXN1_HUMAN	UBX domain-containing protein 1
UBXN6_HUMAN	UBX domain-containing protein 6
UBXN7_HUMAN	UBX domain-containing protein 7
UCHL3_HUMAN	Ubiquitin carboxyl-terminal hydrolase isozyme L3
UCHL5_HUMAN	Ubiquitin carboxyl-terminal hydrolase isozyme L5
UCKL1_HUMAN	Uridine-cytidine kinase-like 1
UEVLD_HUMAN	Ubiquitin-conjugating enzyme E2 variant 3
UMPS_HUMAN	Uridine 5'-monophosphate synthase
UN13D_HUMAN	Protein unc-13 homolog D
UN45A_HUMAN	Protein unc-45 homolog A
USP9X_HUMAN	Probable ubiquitin carboxyl-terminal hydrolase FAF-X
USP9Y_HUMAN	Probable ubiquitin carboxyl-terminal hydrolase FAF-Y
UTRO_HUMAN	Utrophin
VATA_HUMAN	V-type proton ATPase catalytic subunit A
VATH_HUMAN	V-type proton ATPase subunit H
VAV3_HUMAN	Guanine nucleotide exchange factor VAV3
VIGLN_HUMAN	Vigilin
VINEX_HUMAN	Vinexin
VIP2_HUMAN	Inositol hexakisphosphate and diphosphoinositol-pentakisphosphate kinase 2
VP33A_HUMAN	Vacuolar protein sorting-associated protein 33A
VP33B_HUMAN	Vacuolar protein sorting-associated protein 33B
VP37A_HUMAN	Vacuolar protein sorting-associated protein 37A
VP37B_HUMAN	Vacuolar protein sorting-associated protein 37B
VPS11_HUMAN	Vacuolar protein sorting-associated protein 11 homolog
VPS16_HUMAN	Vacuolar protein sorting-associated protein 16 homolog
VPS18_HUMAN	Vacuolar protein sorting-associated protein 18 homolog
VPS25_HUMAN	Vacuolar protein-sorting-associated protein 25
VPS39_HUMAN	Vam6/Vps39-like protein
VPS41_HUMAN	Vacuolar protein sorting-associated protein 41 homolog
VPS50_HUMAN	Syndetin
VPS51_HUMAN	Vacuolar protein sorting-associated protein 51 homolog
VPS52_HUMAN	Vacuolar protein sorting-associated protein 52 homolog
WAPL_HUMAN	Wings apart-like protein homolog
WASH7_HUMAN	WASH complex subunit SWIP
WDHD1_HUMAN	WD repeat and HMG-box DNA-binding protein 1
WDR11_HUMAN	WD repeat-containing protein 11
WDR4_HUMAN	tRNA (guanine-N(7)-)-methyltransferase non-catalytic subunit WDR4
WDR41_HUMAN	WD repeat-containing protein 41
WDR6_HUMAN	WD repeat-containing protein 6
WDR61_HUMAN	WD repeat-containing protein 61
WDR62_HUMAN	WD repeat-containing protein 62
WDR70_HUMAN	WD repeat-containing protein 70
WDR73_HUMAN	WD repeat-containing protein 73
WDR91_HUMAN	WD repeat-containing protein 91
WEE1_HUMAN	Wee1-like protein kinase
WIPI2_HUMAN	WD repeat domain phosphoinositide-interacting protein 2
XIAP_HUMAN	E3 ubiquitin-protein ligase XIAP
XPF_HUMAN	DNA repair endonuclease XPF
XPO1_HUMAN	Exportin-1
XPO5_HUMAN	Exportin-5
XPO6_HUMAN	Exportin-6
XPOT_HUMAN	Exportin-T
XPP1_HUMAN	Xaa-Pro aminopeptidase 1
YJ005_HUMAN	Uncharacterized protein FLJ45252
YTHD1_HUMAN	YTH domain-containing family protein 1
ZBED1_HUMAN	Zinc finger BED domain-containing protein 1
ZCCHL_HUMAN	Zinc finger CCCH-type antiviral protein 1-like
ZFP91_HUMAN	E3 ubiquitin-protein ligase ZFP91
ZFY16_HUMAN	Zinc finger FYVE domain-containing protein 16
ZGPAT_HUMAN	Zinc finger CCCH-type with G patch domain-containing protein
ZHX1_HUMAN	Zinc fingers and homeoboxes protein 1
ZN503_HUMAN	Zinc finger protein 503
ZN598_HUMAN	Zinc finger protein 598
ZN609_HUMAN	Zinc finger protein 609
ZNFX1_HUMAN	NFX1-type zinc finger-containing protein 1
ZNHI2_HUMAN	Zinc finger HIT domain-containing protein 2
ZW10_HUMAN	Centromere/kinetochore protein zw10 homolog
ZWILC_HUMAN	Protein zwilch homolog

## Sheet: Supplementary Table S1-5
UniProtKB Entry Name	Protein Name
AIP_HUMAN	AH receptor-interacting protein
ARAP1_HUMAN	Arf-GAP with Rho-GAP domain, ANK repeat and PH domain-containing protein 1
ARFG3_HUMAN	ADP-ribosylation factor GTPase-activating protein 3
CCD22_HUMAN	Coiled-coil domain-containing protein 22
CMTD1_HUMAN	Catechol O-methyltransferase domain-containing protein 1
COMD3_HUMAN	COMM domain-containing protein 3
DEST_HUMAN	Destrin
ERBIN_HUMAN	Erbin
GGA2_HUMAN	ADP-ribosylation factor-binding protein GGA2
HSF1_HUMAN	Heat shock factor protein 1
IF5A1_HUMAN	Eukaryotic translation initiation factor 5A-1
MAGD2_HUMAN	Melanoma-associated antigen D2
MCMBP_HUMAN	Mini-chromosome maintenance complex-binding protein
PARP4_HUMAN	Poly [ADP-ribose] polymerase 4
PLAP_HUMAN	Phospholipase A-2-activating protein
PPID_HUMAN	Peptidyl-prolyl cis-trans isomerase D
PUS7_HUMAN	Pseudouridylate synthase 7 homolog
RASA1_HUMAN	Ras GTPase-activating protein 1
RRP44_HUMAN	Exosome complex exonuclease RRP44
SC24D_HUMAN	Protein transport protein Sec24D
SELR1_HUMAN	Cytochrome c oxidase assembly factor 7
SNX27_HUMAN	Sorting nexin-27
STXB3_HUMAN	Syntaxin-binding protein 3
TBC15_HUMAN	TBC1 domain family member 15
THTM_HUMAN	3-mercaptopyruvate sulfurtransferase
TS101_HUMAN	Tumor susceptibility gene 101 protein
TTK_HUMAN	Dual specificity protein kinase TTK
UCHL5_HUMAN	Ubiquitin carboxyl-terminal hydrolase isozyme L5
VIP2_HUMAN	Inositol hexakisphosphate and diphosphoinositol-pentakisphosphate kinase 2
WAPL_HUMAN	Wings apart-like protein homolog
WASH7_HUMAN	WASH complex subunit SWIP
WDR91_HUMAN	WD repeat-containing protein 91
WIPI2_HUMAN	WD repeat domain phosphoinositide-interacting protein 2
XPF_HUMAN	DNA repair endonuclease XPF
ZFY16_HUMAN	Zinc finger FYVE domain-containing protein 16
ZN598_HUMAN	Zinc finger protein 598

## Sheet: Supplementary Table S1-6
UniProtKB Entry Name	Protein Name
CNOT1_HUMAN	CCR4-NOT transcription complex subunit 1
HAX1_HUMAN	HCLS1-associated protein X-1
PI4KA_HUMAN	Phosphatidylinositol 4-kinase alpha
TMF1_HUMAN	TATA element modulatory factor
MANBA_HUMAN	Beta-mannosidase
NPC1_HUMAN	Niemann-Pick C1 protein
SNUT1_HUMAN	U4/U6.U5 tri-snRNP-associated protein 1
DIAP1_HUMAN	Protein diaphanous homolog 1
EIF1B_HUMAN	Eukaryotic translation initiation factor 1b
STK10_HUMAN	Serine/threonine-protein kinase 10
SC24A_HUMAN	Protein transport protein Sec24A
CLPT1_HUMAN	Cleft lip and palate transmembrane protein 1
APOE_HUMAN	Apolipoprotein E
VTNC_HUMAN	Vitronectin
APOB_HUMAN	Apolipoprotein B-100
GPX1_HUMAN	Glutathione peroxidase 1
CAN1_HUMAN	Calpain-1 catalytic subunit
TSP1_HUMAN	Thrombospondin-1
ANXA4_HUMAN	Annexin A4
DESP_HUMAN	Desmoplakin
RAB4A_HUMAN	Ras-related protein Rab-4A
ITAL_HUMAN	Integrin alpha-L
NU214_HUMAN	Nuclear pore complex protein Nup214
TCPZ_HUMAN	T-complex protein 1 subunit zeta
MANBA_HUMAN	Beta-mannosidase
NPC1_HUMAN	Niemann-Pick C1 protein
SNUT1_HUMAN	U4/U6.U5 tri-snRNP-associated protein 1
DIAP1_HUMAN	Protein diaphanous homolog 1
EIF1B_HUMAN	Eukaryotic translation initiation factor 1b
STK10_HUMAN	Serine/threonine-protein kinase 10
SC24A_HUMAN	Protein transport protein Sec24A
CLPT1_HUMAN	Cleft lip and palate transmembrane protein 1
APOE_HUMAN	Apolipoprotein E
VTNC_HUMAN	Vitronectin
APOB_HUMAN	Apolipoprotein B-100
GPX1_HUMAN	Glutathione peroxidase 1
CAN1_HUMAN	Calpain-1 catalytic subunit
TSP1_HUMAN	Thrombospondin-1
ANXA4_HUMAN	Annexin A4
DESP_HUMAN	Desmoplakin
RAB4A_HUMAN	Ras-related protein Rab-4A
ITAL_HUMAN	Integrin alpha-L
NU214_HUMAN	Nuclear pore complex protein Nup214
TCPZ_HUMAN	T-complex protein 1 subunit zeta
HSP13_HUMAN	Heat shock 70 kDa protein 13
THOP1_HUMAN	Thimet oligopeptidase
ADK_HUMAN	Adenosine kinase
SRP54_HUMAN	Signal recognition particle 54 kDa protein
ERF1_HUMAN	Eukaryotic peptide chain release factor subunit 1
CYC_HUMAN	Cytochrome c
FKBP4_HUMAN	Peptidyl-prolyl cis-trans isomerase FKBP4
DYST_HUMAN	Dystonin
CEBPZ_HUMAN	CCAAT/enhancer-binding protein zeta
CKAP5_HUMAN	Cytoskeleton-associated protein 5
BOP1_HUMAN	Ribosome biogenesis protein BOP1
TRAM1_HUMAN	Translocating chain-associated membrane protein 1
QSOX2_HUMAN	Sulfhydryl oxidase 2
EIF3M_HUMAN	Eukaryotic translation initiation factor 3 subunit M
CMTD1_HUMAN	Catechol O-methyltransferase domain-containing protein 1
DJC10_HUMAN	DnaJ homolog subfamily C member 10
CPSF7_HUMAN	Cleavage and polyadenylation specificity factor subunit 7
STAG1_HUMAN	Cohesin subunit SA-1
SEH1_HUMAN	Nucleoporin SEH1
MIPEP_HUMAN	Mitochondrial intermediate peptidase
IPYR2_HUMAN	Inorganic pyrophosphatase 2, mitochondrial
TBB1_HUMAN	Tubulin beta-1 chain
SIAS_HUMAN	Sialic acid synthase
ABCB8_HUMAN	ATP-binding cassette sub-family B member 8, mitochondrial
EHD3_HUMAN	EH domain-containing protein 3
HACL1_HUMAN	2-hydroxyacyl-CoA lyase 1
TTC7A_HUMAN	Tetratricopeptide repeat protein 7A
ASC_HUMAN	Apoptosis-associated speck-like protein containing a CARD
SYYM_HUMAN	Tyrosine--tRNA ligase, mitochondrial
