# Supplementary material for: Withaferin A and Celastrol Overwhelm Proteostasis
Source: Int J Mol Sci. 2023 Dec 27;25(1):367. doi: 10.3390/ijms25010367 (PMC10779417; doi:10.3390/ijms25010367)
Supplement: Supplementary file 1 [file ijms-25-00367-s001.zip › Table S2.xls]

## Sheet: Supplementary Table S2-1
UniProtKB Entry Name	Protein Name
2ABA_HUMAN	Serine/threonine-protein phosphatase 2A 55 kDa regulatory subunit B alpha isoform
AL9A1_HUMAN	4-trimethylaminobutyraldehyde dehydrogenase
ALDR_HUMAN	Aldo-keto reductase family 1 member B1
ANXA2_HUMAN	Annexin A2
APT_HUMAN	Adenine phosphoribosyltransferase
AT1A1_HUMAN	Sodium/potassium-transporting ATPase subunit alpha-1
B3AT_HUMAN	Band 3 anion transport protein
CDC37_HUMAN	Hsp90 co-chaperone Cdc37
CGL_HUMAN	Cystathionine gamma-lyase
CH60_HUMAN	60 kDa heat shock protein, mitochondrial
CHRD1_HUMAN	Cysteine and histidine-rich domain-containing protein 1
CND3_HUMAN	Condensin complex subunit 3
DHX15_HUMAN	ATP-dependent RNA helicase DHX15
DHX9_HUMAN	ATP-dependent RNA helicase A
ECM29_HUMAN	Proteasome adapter and scaffold protein ECM29
EF1A1_HUMAN	Elongation factor 1-alpha 1
EF1A2_HUMAN	Elongation factor 1-alpha 2
EIF3E_HUMAN	Eukaryotic translation initiation factor 3 subunit E
EIF3L_HUMAN	Eukaryotic translation initiation factor 3 subunit L
ETFA_HUMAN	Electron transfer flavoprotein subunit alpha, mitochondrial
FANCI_HUMAN	Fanconi anemia group I protein
GCN1_HUMAN	Stalled ribosome sensor GCN1
GSHR_HUMAN	Glutathione reductase, mitochondrial
GSTO1_HUMAN	Glutathione S-transferase omega-1
GTF2I_HUMAN	General transcription factor II-I
GUAA_HUMAN	GMP synthase [glutamine-hydrolyzing]
HS74L_HUMAN	Heat shock 70 kDa protein 4L
HUWE1_HUMAN	E3 ubiquitin-protein ligase HUWE1
IMB1_HUMAN	Importin subunit beta-1
IQGA1_HUMAN	Ras GTPase-activating-like protein IQGAP1
KCY_HUMAN	UMP-CMP kinase
KINH_HUMAN	Kinesin-1 heavy chain
KPYM_HUMAN	Pyruvate kinase PKM
LDHA_HUMAN	L-lactate dehydrogenase A chain
LPPRC_HUMAN	Leucine-rich PPR motif-containing protein, mitochondria
LRC40_HUMAN	Leucine-rich repeat-containing protein 40
MOT1_HUMAN	Monocarboxylate transporter 1
MSH6_HUMAN	DNA mismatch repair protein Msh6
ODPA_HUMAN	Pyruvate dehydrogenase E1 component subunit alpha, somatic form, mitochondrial
PDIA1_HUMAN	Protein disulfide-isomerase
PDIA3_HUMAN	Protein disulfide-isomerase A3
PDIA6_HUMAN	Protein disulfide-isomerase A6
PGK1_HUMAN	Phosphoglycerate kinase 1
PPM1G_HUMAN	Protein phosphatase 1G
PPME1_HUMAN	Protein phosphatase methylesterase 1
PRS7_HUMAN	26S proteasome regulatory subunit 7
PSD13_HUMAN	26S proteasome non-ATPase regulatory subunit 13
PSMD1_HUMAN	26S proteasome non-ATPase regulatory subunit 1
PSMD2_HUMAN	26S proteasome non-ATPase regulatory subunit 2
PSMD6_HUMAN	26S proteasome non-ATPase regulatory subunit 6
PSME2_HUMAN	Proteasome activator complex subunit 2
RIR1_HUMAN	Ribonucleoside-diphosphate reductase large subunit
RLA0_HUMAN	Large ribosomal subunit protein uL1
SF3B1_HUMAN	Splicing factor 3B subunit 1
SYNC_HUMAN	Asparagine--tRNA ligase, cytoplasmic
SYVC_HUMAN	Valine--tRNA ligase
TF2H3_HUMAN	General transcription factor IIH subunit 3
THIO_HUMAN	Thioredoxin
TRXR1_HUMAN	Thioredoxin reductase 1, cytoplasmic
U520_HUMAN	U5 small nuclear ribonucleoprotein 200 kDa helicase
UBA6_HUMAN	Ubiquitin-like modifier-activating enzyme 6
UBR4_HUMAN	E3 ubiquitin-protein ligase UBR4
UN45A_HUMAN	Protein unc-45 homolog A
USO1_HUMAN	General vesicular transport factor p115
USP9X_HUMAN	Probable ubiquitin carboxyl-terminal hydrolase FAF-X
XPOT_HUMAN	Exportin-T

## Sheet: Supplementary Table S2-2
UniProtKB Entry Name	Protein Name
ACACA_HUMAN	Acetyl-CoA carboxylase 1
ADT2_HUMAN	ADP/ATP translocase 2
ALBU_HUMAN	Albumin
ANXA1_HUMAN	Annexin A1
ANXA2_HUMAN	Annexin A2
ANXA5_HUMAN	Annexin A5
AT1A1_HUMAN	Sodium/potassium-transporting ATPase subunit alpha-1
AT2A2_HUMAN	Sarcoplasmic/endoplasmic reticulum calcium ATPase 2
ATPA_HUMAN	ATP synthase subunit alpha, mitochondrial
ATPG_HUMAN	ATP synthase subunit gamma, mitochondrial
BIP_HUMAN	Endoplasmic reticulum chaperone BiP
CALR_HUMAN	Calreticulin
CALX_HUMAN	Calnexin
CH60_HUMAN	60 kDa heat shock protein, mitochondrial
CISY_HUMAN	Citrate synthase, mitochondrial
CLH1_HUMAN	Clathrin heavy chain 1
COF1_HUMAN	Cofilin-1
CPNE3_HUMAN	Copine-3
DDX21_HUMAN	Nucleolar RNA helicase 2
DDX3X_HUMAN	ATP-dependent RNA helicase DDX3X
DDX5_HUMAN	Probable ATP-dependent RNA helicase DDX5
DHB4_HUMAN	Peroxisomal multifunctional enzyme type 2
DHX15_HUMAN	ATP-dependent RNA helicase DHX15
DHX9_HUMAN	ATP-dependent RNA helicase A
DYHC1_HUMAN	Cytoplasmic dynein 1 heavy chain 1
EF1A1_HUMAN	Elongation factor 1-alpha 1
EF1B_HUMAN	Elongation factor 1-beta
EF1G_HUMAN	Elongation factor 1-gamma
EF2_HUMAN	Elongation factor 2
EFTU_HUMAN	Elongation factor Tu, mitochondrial
ENPL_HUMAN	Endoplasmin
FAS_HUMAN	Fatty acid synthase
FKBP4_HUMAN	Peptidyl-prolyl cis-trans isomerase FKBP4
FLNA_HUMAN	Filamin-A
FUBP2_HUMAN	Far upstream element-binding protein 2
GRP75_HUMAN	Stress-70 protein, mitochondrial
H32_HUMAN	Histone H3.2
H4_HUMAN	Histone H4
HBA_HUMAN	Hemoglobin subunit alpha
HNRDL_HUMAN	Heterogeneous nuclear ribonucleoprotein D-like
HNRH1_HUMAN	Heterogeneous nuclear ribonucleoprotein H
HNRPC_HUMAN	Heterogeneous nuclear ribonucleoproteins C1/C2
HNRPD_HUMAN	Heterogeneous nuclear ribonucleoprotein D0
HNRPF_HUMAN	Heterogeneous nuclear ribonucleoprotein F
HNRPK_HUMAN	Heterogeneous nuclear ribonucleoprotein K
HNRPL_HUMAN	Heterogeneous nuclear ribonucleoprotein L
HNRPM_HUMAN	Heterogeneous nuclear ribonucleoprotein M
HNRPQ_HUMAN	Heterogeneous nuclear ribonucleoprotein Q
HNRPR_HUMAN	Heterogeneous nuclear ribonucleoprotein R
HS71B_HUMAN	Heat shock 70 kDa protein 1B
HS90B_HUMAN	Heat shock protein HSP 90-beta
HSP74_HUMAN	Heat shock 70 kDa protein 4
HSP7C_HUMAN	Heat shock cognate 71 kDa protein
HSPB1_HUMAN	Heat shock protein beta-1
IF4A1_HUMAN	Eukaryotic initiation factor 4A-I
IMB1_HUMAN	Importin subunit beta-1
KI67_HUMAN	Proliferation marker protein Ki-67
LMNA_HUMAN	Prelamin-A/C
LPPRC_HUMAN	Leucine-rich PPR motif-containing protein, mitochondria
MAGB2_HUMAN	Melanoma-associated antigen B2
MCM7_HUMAN	DNA replication licensing factor MCM7
MDHM_HUMAN	Malate dehydrogenase, mitochondrial
MIC60_HUMAN	MICOS complex subunit MIC60
NPM_HUMAN	Nucleophosmin
NUCL_HUMAN	Nucleolin
OST48_HUMAN	Dolichyl-diphosphooligosaccharide--protein glycosyltransferase 48 kDa subunit
PARP1_HUMAN	Poly [ADP-ribose] polymerase 1
PCNA_HUMAN	Proliferating cell nuclear antigen
PDIA3_HUMAN	Protein disulfide-isomerase A3
PHB_HUMAN	Prohibitin
PLEC_HUMAN	Plectin
PPIB_HUMAN	Peptidyl-prolyl cis-trans isomerase B
PRDX1_HUMAN	Peroxiredoxin-1
PRDX2_HUMAN	Peroxiredoxin-2
PRDX3_HUMAN	Thioredoxin-dependent peroxide reductase, mitochondrial
PRKDC_HUMAN	DNA-dependent protein kinase catalytic subunit
PSA4_HUMAN	Proteasome subunit alpha type-4
PSMD2_HUMAN	26S proteasome non-ATPase regulatory subunit 2
PTBP1_HUMAN	Polypyrimidine tract-binding protein 1
RAB7A_HUMAN	Ras-related protein Rab-7a
RL11_HUMAN	Large ribosomal subunit protein uL5
RL18_HUMAN	Large ribosomal subunit protein eL18
RL24_HUMAN	Large ribosomal subunit protein eL24
RL40_HUMAN	Ubiquitin-ribosomal protein eL40 fusion protein
RS2_HUMAN	Small ribosomal subunit protein uS5
RS3A_HUMAN	Small ribosomal subunit protein eS1
RS9_HUMAN	Small ribosomal subunit protein uS4
S10A4_HUMAN	Sodium-driven chloride bicarbonate exchanger
SERPH_HUMAN	Serpin H1
SYQ_HUMAN	Glutamine--tRNA ligase
TBA1B_HUMAN	Tubulin alpha-1B chain
TBL3_HUMAN	Transducin beta-like protein 3
TCPE_HUMAN	T-complex protein 1 subunit epsilon
TCPZ_HUMAN	T-complex protein 1 subunit zeta
TRY1_HUMAN	Serine protease 1
U520_HUMAN	U5 small nuclear ribonucleoprotein 200 kDa helicase
VDAC1_HUMAN	Voltage-dependent anion-selective channel protein 1
VDAC3_HUMAN	Voltage-dependent anion-selective channel protein 3
VPS35_HUMAN	Vacuolar protein sorting-associated protein 35
XRCC5_HUMAN	X-ray repair cross-complementing protein 5

## Sheet: Supplementary Table S2-3
UniProtKB Entry Name	Protein Name
ANXA2_HUMAN	Annexin A2
AT1A1_HUMAN	Sodium/potassium-transporting ATPase subunit alpha-1
CH60_HUMAN	60 kDa heat shock protein, mitochondrial
DHX15_HUMAN	ATP-dependent RNA helicase DHX15
DHX9_HUMAN	ATP-dependent RNA helicase A
EF1A1_HUMAN	Elongation factor 1-alpha 1
IMB1_HUMAN	Importin subunit beta-1
LPPRC_HUMAN	Leucine-rich PPR motif-containing protein, mitochondria
PDIA3_HUMAN	Protein disulfide-isomerase A3
PSMD2_HUMAN	26S proteasome non-ATPase regulatory subunit 2
U520_HUMAN	U5 small nuclear ribonucleoprotein 200 kDa helicase

## Sheet: Supplementary Table S2-4
UniProtKB Entry Name	Protein Name
2ABA_HUMAN	Serine/threonine-protein phosphatase 2A 55 kDa regulatory subunit B alpha isoform
CGL_HUMAN	Cystathionine gamma-lyase
HNRDL_HUMAN	Heterogeneous nuclear ribonucleoprotein D-like
TBL3_HUMAN	Transducin beta-like protein 3
